# Supplementary material
Source: PubMed Central journal article supplement (PMC7296855)

**Supplementary Table 1. Differentially expressed genes (DEGs) between *Tmem106b*<sup>-/-</sup> and *Tmem106b*<sup>+/+</sup> animals.**

| Gene_ID            | Symbol   | Chr   | Stepup p-value | Fold-Change |
|--------------------|----------|-------|----------------|-------------|
| ENSMUSG00000029571 | Tmem106b | chr6  | 2.03E-23       | -3.12039    |
| ENSMUSG00000034714 | Ttyh2    | chr11 | 2.75E-07       | -1.1537     |
| ENSMUSG00000033579 | Fa2h     | chr8  | 2.75E-07       | -1.30621    |
| ENSMUSG00000037625 | Cldn11   | chr3  | 7.92E-07       | -1.21051    |
| ENSMUSG00000027375 | Mal      | chr2  | 1.31E-05       | -1.23669    |
| ENSMUSG00000028412 | Slc44a1  | chr4  | 1.74E-05       | -1.08721    |
| ENSMUSG00000038668 | Lpar1    | chr4  | 4.07E-05       | -1.26056    |
| ENSMUSG00000006782 | Cnp      | chr11 | 4.90E-05       | -1.2202     |
| ENSMUSG00000026830 | Ermn     | chr2  | 4.98E-05       | -1.24287    |
| ENSMUSG00000006403 | Adamts4  | chr1  | 7.42E-05       | -1.23671    |
| ENSMUSG00000032854 | Ugt8a    | chr3  | 0.000135807    | -1.31187    |
| ENSMUSG00000041828 | Abca8a   | chr11 | 0.000155299    | -1.25286    |
| ENSMUSG00000037280 | Galnt6   | chr15 | 0.000231061    | -1.21704    |
| ENSMUSG00000036777 | Anln     | chr9  | 0.00030604     | -1.25418    |
| ENSMUSG00000020023 | Tmcc3    | chr10 | 0.000338856    | -1.18704    |
| ENSMUSG00000031385 | Plxnb3   | chrX  | 0.000338856    | -1.18882    |
| ENSMUSG00000039904 | Gpr37    | chr6  | 0.000363117    | -1.20615    |
| ENSMUSG00000038173 | Enpp6    | chr8  | 0.000428456    | -1.34278    |
| ENSMUSG00000032625 | Thsd7a   | chr6  | 0.000602581    | -1.15041    |
| ENSMUSG00000000149 | Gna12    | chr5  | 0.000657287    | -1.1501     |
| ENSMUSG00000041062 | Mslnl    | chr17 | 0.000657287    | 1.97176     |
| ENSMUSG00000076439 | Mog      | chr17 | 0.000657287    | -1.15332    |
| ENSMUSG00000005125 | Ndrp1    | chr15 | 0.00069827     | -1.15117    |
| ENSMUSG00000020758 | Itgb4    | chr11 | 0.000724265    | -1.19869    |
| ENSMUSG00000022472 | Desi1    | chr15 | 0.00109528     | -1.08816    |
| ENSMUSG00000033904 | Ccp110   | chr7  | 0.00143325     | -1.0887     |
| ENSMUSG00000026519 | Tmem63a  | chr1  | 0.00151268     | -1.19769    |
| ENSMUSG00000049721 | Gal3st1  | chr11 | 0.00151268     | -1.20775    |
| ENSMUSG00000050121 | Opalin   | chr19 | 0.00211334     | -1.40524    |
| ENSMUSG00000024812 | Tjp2     | chr19 | 0.00211334     | -1.15108    |
| ENSMUSG00000033006 | Sox10    | chr15 | 0.00217224     | -1.2651     |
| ENSMUSG00000022500 | Litaf    | chr16 | 0.00217224     | -1.21825    |
| ENSMUSG00000001729 | Akt1     | chr12 | 0.0023424      | -1.03975    |
| ENSMUSG00000032554 | Trf      | chr9  | 0.0023424      | -1.17954    |
| ENSMUSG00000041895 | Wipi1    | chr11 | 0.00265916     | -1.12021    |
| ENSMUSG00000028917 | Plekhh2  | chr4  | 0.00265916     | -1.0802     |
| ENSMUSG00000033949 | Trim36   | chr18 | 0.00265916     | -1.19757    |
| ENSMUSG00000019820 | Utrn     | chr10 | 0.00416357     | -1.08329    |
| ENSMUSG00000046160 | Olig1    | chr16 | 0.00418629     | -1.18584    |
| ENSMUSG00000027562 | Car2     | chr3  | 0.00418629     | -1.15592    |
| ENSMUSG00000036907 | C1ql2    | chr1  | 0.00418629     | -1.24378    |
| ENSMUSG00000035441 | Myo1d    | chr11 | 0.00418629     | -1.17974    |
| ENSMUSG00000056966 | Gjc3     | chr5  | 0.00432233     | -1.1296     |
| ENSMUSG00000036644 | Tbc1d9b  | chr11 | 0.00432233     | -1.08264    |
| ENSMUSG00000031714 | Gab1     | chr8  | 0.00432233     | -1.16612    |
| ENSMUSG00000032841 | Prr5l    | chr2  | 0.00432233     | -1.21533    |
| ENSMUSG00000047797 | Gjb1     | chrX  | 0.00432233     | -1.20703    |
| ENSMUSG00000028082 | Sh3d19   | chr3  | 0.00447485     | -1.11753    |
| ENSMUSG00000078771 | Evi2a    | chr11 | 0.00457461     | -1.14241    |
| ENSMUSG00000035413 | Tmem98   | chr11 | 0.00467163     | -1.19303    |
| ENSMUSG00000060716 | Plekhh1  | chr12 | 0.00478522     | -1.12667    |

|                    |          |       |            |          |
|--------------------|----------|-------|------------|----------|
| ENSMUSG00000020411 | Nipal4   | chr11 | 0.00478522 | -1.27989 |
| ENSMUSG00000036098 | Myrf     | chr19 | 0.00484794 | -1.15008 |
| ENSMUSG00000030630 | Fah      | chr7  | 0.00485039 | -1.1348  |
| ENSMUSG00000041607 | Mbp      | chr18 | 0.00485039 | -1.11133 |
| ENSMUSG00000037458 | Azin1    | chr15 | 0.00485039 | 1.07391  |
| ENSMUSG00000025584 | Pde8a    | chr7  | 0.00485039 | -1.177   |
| ENSMUSG00000033039 | Micall1  | chr15 | 0.00485039 | -1.12024 |
| ENSMUSG00000073680 | Tmem88b  | chr4  | 0.00485039 | -1.17068 |
| ENSMUSG00000000805 | Car4     | chr11 | 0.00514752 | 1.12386  |
| ENSMUSG00000024187 | Itfg3    | chr17 | 0.00515316 | -1.1043  |
| ENSMUSG00000049092 | Gpr137c  | chr14 | 0.00515938 | 1.13975  |
| ENSMUSG00000043448 | Gjc2     | chr11 | 0.00515938 | -1.27688 |
| ENSMUSG00000025504 | Eps8l2   | chr7  | 0.00517914 | -1.15386 |
| ENSMUSG00000001864 | Aif1l    | chr2  | 0.00524086 | -1.22669 |
| ENSMUSG00000052609 | Plekhg3  | chr12 | 0.00544526 | -1.13777 |
| ENSMUSG00000042625 | Safb2    | chr17 | 0.00574441 | 1.07757  |
| ENSMUSG00000064325 | Hhip     | chr8  | 0.00657371 | -1.30964 |
| ENSMUSG00000007891 | Ctsd     | chr7  | 0.00657371 | 1.06854  |
| ENSMUSG00000013698 | Pea15a   | chr1  | 0.0067914  | -1.06386 |
| ENSMUSG00000019880 | Rspo3    | chr10 | 0.0067914  | 1.17599  |
| ENSMUSG00000037031 | Tspan15  | chr10 | 0.00718829 | -1.14251 |
| ENSMUSG00000060675 | Pla2g16  | chr19 | 0.00739811 | -1.11055 |
| ENSMUSG00000032135 | Mcam     | chr9  | 0.00739811 | -1.21436 |
| ENSMUSG00000055717 | Slain1   | chr14 | 0.00739811 | -1.1128  |
| ENSMUSG00000033557 | Fam20b   | chr1  | 0.00739811 | -1.05268 |
| ENSMUSG00000018449 | Rpain    | chr11 | 0.00768149 | 1.15395  |
| ENSMUSG00000037166 | Ppp1r14a | chr7  | 0.00768149 | -1.22243 |
| ENSMUSG00000081534 | Slc48a1  | chr15 | 0.00872803 | -1.06303 |
| ENSMUSG00000020486 | Sept4    | chr11 | 0.00872803 | -1.09048 |
| ENSMUSG00000017417 | Plxdc1   | chr11 | 0.00880978 | -1.10698 |
| ENSMUSG00000020846 | Fam101b  | chr11 | 0.0101713  | -1.17585 |
| ENSMUSG00000056515 | Rab31    | chr17 | 0.0105553  | -1.06731 |
| ENSMUSG00000031425 | Plp1     | chrX  | 0.0105637  | -1.13494 |
| ENSMUSG00000015755 | Tab2     | chr10 | 0.0113115  | -1.05915 |
| ENSMUSG00000027858 | Tspan2   | chr3  | 0.0117513  | -1.13282 |
| ENSMUSG00000021709 | Erbp2ip  | chr13 | 0.0117532  | -1.11334 |
| ENSMUSG00000031762 | Mt2      | chr8  | 0.0119488  | 1.37532  |
| ENSMUSG00000015757 | Ppil4    | chr10 | 0.0123085  | 1.06244  |
| ENSMUSG00000030751 | Psm1     | chr7  | 0.0124541  | 1.05126  |
| ENSMUSG00000019899 | Lama2    | chr10 | 0.0125757  | -1.12936 |
| ENSMUSG00000030849 | Fgfr2    | chr7  | 0.0129867  | -1.15497 |
| ENSMUSG00000020536 | Lgl1     | chr11 | 0.0130109  | -1.07583 |
| ENSMUSG00000024816 | Frmf8    | chr19 | 0.0132594  | -1.12572 |
| ENSMUSG00000039316 | Rftn1    | chr17 | 0.0149621  | -1.11979 |
| ENSMUSG00000073982 | Rhog     | chr7  | 0.015412   | -1.16694 |
| ENSMUSG00000090083 | Rnf8     | chr17 | 0.0163712  | -1.06224 |
| ENSMUSG00000031628 | Casp3    | chr8  | 0.0163712  | 1.17511  |
| ENSMUSG00000058835 | Abi1     | chr2  | 0.0173073  | 1.07001  |
| ENSMUSG00000015451 | C4a      | chr17 | 0.0173073  | 1.20235  |
| ENSMUSG00000045404 | Kcnk13   | chr12 | 0.0181938  | -1.17602 |
| ENSMUSG00000041935 | AW549877 | chr15 | 0.0184128  | 1.06839  |
| ENSMUSG00000003934 | Efnb3    | chr11 | 0.0185397  | -1.07886 |
| ENSMUSG00000024268 | Celf4    | chr18 | 0.0185437  | -1.0668  |
| ENSMUSG00000037242 | Clic4    | chr4  | 0.0186651  | -1.0917  |
| ENSMUSG00000011877 | Git1     | chr11 | 0.0188527  | -1.07853 |

|                    |           |       |           |          |
|--------------------|-----------|-------|-----------|----------|
| ENSMUSG00000048537 | Phldb1    | chr9  | 0.0195804 | -1.12093 |
| ENSMUSG00000090121 | Abhd12b   | chr12 | 0.0195804 | -1.38407 |
| ENSMUSG00000024558 | Mapk4     | chr18 | 0.0195804 | 1.08588  |
| ENSMUSG00000020932 | Gfap      | chr11 | 0.0206826 | 1.16646  |
| ENSMUSG00000026203 | Dnajb2    | chr1  | 0.0208456 | -1.06301 |
| ENSMUSG00000027215 | Cd82      | chr2  | 0.0220344 | -1.13454 |
| ENSMUSG00000021143 | Pacs2     | chr12 | 0.022259  | -1.10226 |
| ENSMUSG00000020811 | Wscd1     | chr11 | 0.022259  | -1.08792 |
| ENSMUSG00000049807 | Arhgap23  | chr11 | 0.0227066 | -1.09371 |
| ENSMUSG00000030137 | Tuba8     | chr6  | 0.0240665 | -1.12919 |
| ENSMUSG00000028364 | Tnc       | chr4  | 0.0249303 | -1.31023 |
| ENSMUSG00000044447 | Dock5     | chr14 | 0.0253919 | -1.18833 |
| ENSMUSG00000040234 | Tm7sf3    | chr6  | 0.0253919 | -1.08491 |
| ENSMUSG00000019647 | Sema6a    | chr18 | 0.0253919 | -1.13285 |
| ENSMUSG00000020788 | Atp2a3    | chr11 | 0.0253919 | -1.23844 |
| ENSMUSG00000052155 | Acvr2a    | chr2  | 0.0258135 | 1.07658  |
| ENSMUSG00000002831 | Plin4     | chr17 | 0.0266461 | 2.19007  |
| ENSMUSG00000044258 | Ctla2a    | chr13 | 0.0272797 | 1.3388   |
| ENSMUSG00000092021 | Gbp11     | chr5  | 0.0272797 | -1.45112 |
| ENSMUSG00000028971 | Cort      | chr4  | 0.027575  | 1.40669  |
| ENSMUSG00000042066 | Tmcc2     | chr1  | 0.027575  | -1.07969 |
| ENSMUSG00000068882 | Ssb       | chr2  | 0.028348  | 1.07644  |
| ENSMUSG00000036905 | C1qb      | chr4  | 0.0283812 | 1.13508  |
| ENSMUSG00000041309 | Nkx6-2    | chr7  | 0.0286983 | -1.14379 |
| ENSMUSG00000024777 | Ppp2r5b   | chr19 | 0.0288173 | 1.07137  |
| ENSMUSG00000037010 | Apln      | chrX  | 0.0288842 | -1.25238 |
| ENSMUSG00000025979 | Mob4      | chr1  | 0.0296954 | 1.0655   |
| ENSMUSG00000087050 | Dhrs13os  | chr11 | 0.0297811 | -1.08099 |
| ENSMUSG00000027954 | Efna1     | chr3  | 0.0301765 | -1.19544 |
| ENSMUSG00000038351 | Sgsm2     | chr11 | 0.0313386 | -1.07929 |
| ENSMUSG00000062078 | Qk        | chr17 | 0.0318651 | -1.0577  |
| ENSMUSG00000090062 | Galnt6os  | chr15 | 0.0320293 | -1.1959  |
| ENSMUSG00000085008 | Dbhos     | chr2  | 0.0327938 | -1.20123 |
| ENSMUSG00000037656 | Slc20a2   | chr8  | 0.0327938 | -1.13795 |
| ENSMUSG00000020864 | Ankrd40   | chr11 | 0.0327938 | -1.04307 |
| ENSMUSG00000030513 | Pcsk6     | chr7  | 0.0327938 | -1.14552 |
| ENSMUSG00000026074 | Map4k4    | chr1  | 0.0327938 | -1.06917 |
| ENSMUSG00000031410 | Nxf7      | chrX  | 0.0327938 | -1.70334 |
| ENSMUSG00000070423 | Olf1558   | chr7  | 0.0327938 | -1.7612  |
| ENSMUSG00000071042 | Rasgrp3   | chr17 | 0.0343125 | -1.14154 |
| ENSMUSG00000024188 | Luc7l     | chr17 | 0.0343125 | 1.06504  |
| ENSMUSG00000012609 | Ttll5     | chr12 | 0.0344909 | -1.10634 |
| ENSMUSG00000032599 | Ip6k2     | chr9  | 0.0351575 | 1.08407  |
| ENSMUSG00000027288 | Zfp106    | chr2  | 0.0351575 | -1.07033 |
| ENSMUSG00000066687 | Zbtb16    | chr9  | 0.0353153 | 1.28698  |
| ENSMUSG00000065514 | Mir106b   | chr5  | 0.0353153 | -2.89311 |
| ENSMUSG00000017009 | Sdc4      | chr2  | 0.0353153 | 1.14611  |
| ENSMUSG00000032902 | Slc16a1   | chr3  | 0.0353153 | -1.13572 |
| ENSMUSG00000044037 | Als2cl    | chr9  | 0.0353153 | 1.12341  |
| ENSMUSG00000020089 | Ppa1      | chr10 | 0.0369378 | 1.0699   |
| ENSMUSG00000062604 | Srpk2     | chr5  | 0.0369378 | 1.03515  |
| ENSMUSG00000042292 | Mkl1      | chr15 | 0.0369378 | 1.09541  |
| ENSMUSG00000035093 | Secisbp2l | chr2  | 0.0369378 | -1.05598 |
| ENSMUSG00000040850 | Psme4     | chr11 | 0.0369378 | 1.07577  |
| ENSMUSG00000021696 | Elovl7    | chr13 | 0.0369378 | -1.14536 |

|                    |          |       |           |          |
|--------------------|----------|-------|-----------|----------|
| ENSMUSG00000064201 | Krt2     | chr15 | 0.037705  | -1.4546  |
| ENSMUSG00000019873 | Reep3    | chr10 | 0.037705  | -1.09089 |
| ENSMUSG00000027199 | Gatm     | chr2  | 0.037705  | -1.10149 |
| ENSMUSG00000012640 | Zfp715   | chr7  | 0.037705  | 1.08186  |
| ENSMUSG00000024381 | Bin1     | chr18 | 0.037705  | -1.08147 |
| ENSMUSG00000057134 | Ado      | chr10 | 0.037705  | -1.06751 |
| ENSMUSG00000043496 | Tril     | chr6  | 0.037705  | -1.11197 |
| ENSMUSG00000007877 | Tcap     | chr11 | 0.037705  | 1.29297  |
| ENSMUSG00000004328 | Hif3a    | chr7  | 0.037705  | 1.84648  |
| ENSMUSG00000010048 | lfrd2    | chr9  | 0.037705  | 1.14905  |
| ENSMUSG00000022205 | Sub1     | chr15 | 0.0383259 | 1.06698  |
| ENSMUSG00000074457 | S100a16  | chr3  | 0.0387143 | -1.12779 |
| ENSMUSG00000061762 | Tac1     | chr6  | 0.0393756 | 1.16201  |
| ENSMUSG00000030256 | Bhlhe41  | chr6  | 0.0394173 | 1.1939   |
| ENSMUSG00000031765 | Mt1      | chr8  | 0.0409994 | 1.09568  |
| ENSMUSG00000025724 | Sec11a   | chr7  | 0.0420148 | 1.10169  |
| ENSMUSG00000059149 | Mfsd4    | chr1  | 0.0420148 | 1.1096   |
| ENSMUSG00000001348 | Acp5     | chr9  | 0.0433091 | 1.86573  |
| ENSMUSG00000087141 | Plcx2    | chr16 | 0.0445803 | -1.09373 |
| ENSMUSG00000011884 | Glt1     | chr5  | 0.0458169 | -1.10387 |
| ENSMUSG00000008035 | Mid1ip1  | chrX  | 0.0458169 | -1.0913  |
| ENSMUSG00000064496 | DQ267101 | chr12 | 0.0458169 | 2.36522  |
| ENSMUSG00000022752 | Tomm70a  | chr16 | 0.0458169 | 1.05813  |
| ENSMUSG00000071176 | Arhgef10 | chr8  | 0.0458169 | -1.09911 |
| ENSMUSG00000034480 | Diap2    | chrX  | 0.0458169 | 1.08905  |
| ENSMUSG00000103344 | GBP11    | chr5  | 0.0458169 | -1.43098 |
| ENSMUSG00000001366 | Fbxo9    | chr9  | 0.0458169 | 1.07834  |
| ENSMUSG00000008393 | Carhsp1  | chr16 | 0.0458169 | -1.08352 |
| ENSMUSG00000040596 | Pogk     | chr1  | 0.0458169 | -1.05109 |
| ENSMUSG00000017428 | Psm11    | chr11 | 0.0458169 | 1.0604   |
| ENSMUSG00000042328 | Hps4     | chr5  | 0.0458169 | 1.10558  |
| ENSMUSG00000058070 | Eml1     | chr12 | 0.0458169 | -1.08945 |
| ENSMUSG00000014361 | Mertk    | chr2  | 0.0458169 | 1.1832   |
| ENSMUSG00000038619 | Ensa     | chr3  | 0.0458257 | 1.06265  |
| ENSMUSG00000051675 | Trim32   | chr4  | 0.0458257 | 1.05495  |
| ENSMUSG00000021214 | Akr1c18  | chr13 | 0.0458257 | -1.72371 |
| ENSMUSG00000032060 | Cryab    | chr9  | 0.0462347 | -1.16777 |
| ENSMUSG00000036580 | Spg20    | chr3  | 0.0462347 | -1.07961 |
| ENSMUSG00000036634 | Mag      | chr7  | 0.0462347 | -1.10002 |
| ENSMUSG00000024066 | Xdh      | chr17 | 0.0464722 | 1.34967  |
| ENSMUSG00000051617 | Krt9     | chr11 | 0.0466942 | -1.15899 |
| ENSMUSG00000021990 | Spata13  | chr14 | 0.047042  | -1.09114 |
| ENSMUSG00000022483 | Col2a1   | chr15 | 0.047864  | -1.34711 |
| ENSMUSG00000059602 | Syn3     | chr10 | 0.047864  | 1.10008  |
| ENSMUSG00000076144 | Mir709   | chr8  | 0.0480931 | 2.37747  |
| ENSMUSG00000058756 | Thra     | chr11 | 0.048867  | -1.04984 |
| ENSMUSG00000040848 | Sft2d2   | chr1  | 0.048867  | -1.0962  |
| ENSMUSG00000031775 | Pllp     | chr8  | 0.048867  | -1.15664 |
| ENSMUSG00000027434 | Nkx2-2   | chr2  | 0.048867  | -1.16674 |
| ENSMUSG00000021596 | Mctp1    | chr13 | 0.0497665 | 1.08087  |
| ENSMUSG00000047412 | Zbtb44   | chr9  | 0.0497665 | 1.07404  |
| ENSMUSG00000015090 | Ptgds    | chr2  | 0.0497665 | 1.10198  |

---

**Supplementary Table 2. Differentially expressed genes (DEGs) between *Tmem106b*<sup>-/-</sup> and *Tmem106b*<sup>+/-</sup> animals.**

| Gene_ID            | Symbol   | Chr   | Stepup p-value | Fold-Change |
|--------------------|----------|-------|----------------|-------------|
| ENSMUSG00000029571 | Tmem106b | chr6  | 1.06E-18       | -2.06917    |
| ENSMUSG00000032854 | Ugt8a    | chr3  | 1.30E-02       | -1.22483    |
| ENSMUSG00000090062 | Galnt6os | chr15 | 4.63E-02       | -1.22176    |
| ENSMUSG00000033579 | Fa2h     | chr8  | 1.63E-04       | -1.21426    |
| ENSMUSG00000041828 | Abca8a   | chr11 | 4.19E-03       | -1.21189    |
| ENSMUSG00000006403 | Adamts4  | chr1  | 2.16E-03       | -1.20084    |
| ENSMUSG00000037280 | Galnt6   | chr15 | 2.44E-03       | -1.19723    |
| ENSMUSG00000028681 | Ptch2    | chr4  | 1.67E-02       | -1.19163    |
| ENSMUSG00000036777 | Anln     | chr9  | 1.52E-02       | -1.19087    |
| ENSMUSG00000047797 | Gjb1     | chrX  | 0.0277294      | -1.18849    |
| ENSMUSG00000039904 | Gpr37    | chr6  | 0.00548018     | -1.18191    |
| ENSMUSG00000038668 | Lpar1    | chr4  | 0.0107686      | -1.17804    |
| ENSMUSG00000030137 | Tuba8    | chr6  | 0.0129935      | -1.16495    |
| ENSMUSG00000026830 | Ermn     | chr2  | 0.0176258      | -1.15258    |
| ENSMUSG00000032554 | Trf      | chr9  | 0.0350375      | -1.14865    |
| ENSMUSG00000006782 | Cnp      | chr11 | 0.0129935      | -1.1473     |
| ENSMUSG00000027375 | Mal      | chr2  | 0.0129935      | -1.14207    |
| ENSMUSG00000037625 | Cldn11   | chr3  | 0.00151083     | -1.13726    |
| ENSMUSG00000031385 | Plxn3    | chrX  | 0.0348441      | -1.13054    |
| ENSMUSG00000076439 | Mog      | chr17 | 0.0138916      | -1.12798    |
| ENSMUSG00000024816 | Frm8     | chr19 | 0.0462895      | -1.12564    |
| ENSMUSG00000034714 | Ttyh2    | chr11 | 0.00151083     | -1.09353    |
| ENSMUSG00000041298 | Katnal1  | chr5  | 0.0462895      | -1.05251    |
| ENSMUSG00000007891 | Ctsd     | chr7  | 0.0176258      | 1.06975     |
| ENSMUSG00000018651 | Tada2a   | chr11 | 0.0166744      | 1.09668     |
| ENSMUSG00000025555 | Farp1    | chr14 | 0.0166744      | 1.11312     |
| ENSMUSG00000000805 | Car4     | chr11 | 0.0129935      | 1.13233     |
| ENSMUSG00000020932 | Gfap     | chr11 | 0.0166744      | 1.20072     |
| ENSMUSG00000015451 | C4a      | chr17 | 0.0462895      | 1.20831     |
| ENSMUSG00000073418 | C4b      | chr17 | 0.0277294      | 1.2195      |
| ENSMUSG00000041062 | Msl1l    | chr17 | 0.0144737      | 1.76505     |

**Supplementary Table 3. Oligodendrocyte enriched and myelination-related genes**  
**list[obtained from JAX Mouse Genome Informatics (<http://www.informatics.jax.org/>)].**

| <b>MGI Gene/Marker ID</b> | <b>Symbol</b> | <b>Chr</b> |
|---------------------------|---------------|------------|
| MGI:97435                 | Mog           | 17         |
| MGI:1355334               | Olig1         | 16         |
| MGI:1355331               | Olig2         | 16         |
| MGI:2149955               | Olig3         | 10         |
| MGI:106586                | Omg           | 11         |
| MGI:106925                | Cldn11        | 3          |
| MGI:108511                | Mobp          | 9          |
| MGI:2657025               | Opalin        | 19         |
| MGI:99606                 | Abca2         | 2          |
| MGI:1932576               | Akap12        | 10         |
| MGI:96919                 | Ascl1         | 10         |
| MGI:87914                 | Aspa          | 11         |
| MGI:1927169               | B4galt5       | 2          |
| MGI:1928380               | B4galt6       | 18         |
| MGI:88180                 | Bmp4          | 14         |
| MGI:101765                | Cdk5          | 5          |
| MGI:88423                 | Clu           | 14         |
| MGI:88437                 | Cnp           | 11         |
| MGI:104518                | Cntn2         | 1          |
| MGI:1858201               | Cntnap1       | 11         |
| MGI:88276                 | Ctnnb1        | 9          |
| MGI:109563                | Cxcr4         | 1          |
| MGI:1923691               | Daam2         | 17         |
| MGI:101864                | Dag1          | 9          |
| MGI:2177178               | Dicer1        | 12         |
| MGI:94901                 | Dlx1          | 2          |
| MGI:94902                 | Dlx2          | 2          |
| MGI:94925                 | Drd3          | 16         |
| MGI:1927070               | Dusp10        | 1          |
| MGI:1934928               | Dusp15        | 2          |
| MGI:2384802               | Eif2b1        | 5          |
| MGI:2145118               | Eif2b2        | 12         |
| MGI:1313286               | Eif2b3        | 4          |
| MGI:95300                 | Eif2b4        | 5          |
| MGI:2446176               | Eif2b5        | 16         |
| MGI:1321390               | Enpp2         | 15         |
| MGI:95410                 | Erbp2         | 11         |
| MGI:95413                 | Ercc2         | 7          |
| MGI:1096376               | Exoc4         | 6          |
| MGI:2443327               | Fa2h          | 8          |
| MGI:95524                 | Fgfr3         | 5          |
| MGI:95660                 | Gas6          | 8          |

|             |           |    |
|-------------|-----------|----|
| MGI:95729   | Gli3      | 13 |
| MGI:87940   | Grk2      | 19 |
| MGI:95843   | Gsx2      | 5  |
| MGI:108086  | Hdac1     | 4  |
| MGI:2385252 | Hdac11    | 6  |
| MGI:1097691 | Hdac2     | 10 |
| MGI:104853  | Hes1      | 16 |
| MGI:104876  | Hes5      | 4  |
| MGI:96397   | Id2       | 12 |
| MGI:99414   | Id4       | 13 |
| MGI:96432   | Igf1      | 10 |
| MGI:1923777 | Il34      | 8  |
| MGI:1194504 | Kcnj10    | 1  |
| MGI:1915522 | Lingo1    | 9  |
| MGI:96912   | Mag       | 7  |
| MGI:96949   | Mdk       | 2  |
| MGI:1926212 | Med12     | X  |
| MGI:3618753 | Mir219a-1 | 17 |
| MGI:3618754 | Mir219a-2 | 2  |
| MGI:2676897 | Mir23a    | 8  |
| MGI:1928394 | Mtor      | 4  |
| MGI:2684944 | Myrf      | 19 |
| MGI:1891700 | Ncstn     | 1  |
| MGI:97306   | Nf1       | 11 |
| MGI:108067  | Nkx2-1    | 12 |
| MGI:97347   | Nkx2-2    | 2  |
| MGI:3652259 | Nkx2-2os  | 2  |
| MGI:1206039 | Nkx6-1    | 5  |
| MGI:1352738 | Nkx6-2    | 7  |
| MGI:2444609 | Nlgn3     | X  |
| MGI:97363   | Notch1    | 2  |
| MGI:96083   | Nrg1      | 8  |
| MGI:97384   | Ntrk2     | 13 |
| MGI:97451   | Otx2      | 14 |
| MGI:97490   | Pax6      | 2  |
| MGI:97623   | Plp1      | X  |
| MGI:97747   | Pparg     | 6  |
| MGI:1924880 | Prdm8     | 5  |
| MGI:1351645 | Prmt5     | 14 |
| MGI:109583  | Pten      | 19 |
| MGI:97804   | Ptn       | 6  |
| MGI:97808   | Ptptra    | 2  |
| MGI:104574  | Ptprj     | 2  |
| MGI:97816   | Ptprz1    | 6  |
| MGI:97837   | Qk        | 17 |
| MGI:97912   | Rheb      | 5  |
| MGI:98297   | Shh       | 5  |

|             |               |    |
|-------------|---------------|----|
| MGI:1927664 | Sirt2         | 7  |
| MGI:1922082 | Slc45a3       | 1  |
| MGI:107976  | Slc8a3        | 12 |
| MGI:98358   | Sox10         | 15 |
| MGI:98367   | Sox5          | 6  |
| MGI:98368   | Sox6          | 7  |
| MGI:98370   | Sox8          | 17 |
| MGI:98371   | Sox9          | 11 |
| MGI:1202879 | Tcf7l2        | 19 |
| MGI:2447063 | Tenm4         | 7  |
| MGI:98725   | Tgfb1         | 7  |
| MGI:1346060 | Tlr2          | 3  |
| MGI:1923457 | Tmem98        | 11 |
| MGI:1314883 | Tnfrsf1b      | 4  |
| MGI:2151075 | Tnfrsf21      | 17 |
| MGI:98834   | Trp53         | 11 |
| MGI:1336991 | Trp73         | 4  |
| MGI:109525  | Trpc4         | 3  |
| MGI:1917997 | Tspan2        | 3  |
| MGI:1921622 | Ulk4          | 9  |
| MGI:98940   | Vtn           | 11 |
| MGI:2658986 | Wasf3         | 5  |
| MGI:1337100 | Wdr1          | 5  |
| MGI:2143676 | Zfp365        | 10 |
| MGI:2686052 | Zfp488        | 14 |
| MGI:2442953 | 9630013A20Rik | 14 |
| MGI:87880   | Aco2          | 15 |
| MGI:87904   | Actb          | 5  |
| MGI:87906   | Actg1         | 11 |
| MGI:1858964 | Actr1a        | 19 |
| MGI:105094  | Adcyap1       | 17 |
| MGI:1314653 | Afdn          | 17 |
| MGI:1928277 | Afg3l1        | 8  |
| MGI:1916847 | Afg3l2        | 18 |
| MGI:1353494 | Akr1b3        | 6  |
| MGI:87991   | Alb           | 5  |
| MGI:87994   | Aldoa         | 7  |
| MGI:88246   | Anxa2         | 9  |
| MGI:99435   | Arf6          | 12 |
| MGI:88090   | Ass1          | 2  |
| MGI:88105   | Atp1a1        | 3  |
| MGI:88106   | Atp1a2        | 1  |
| MGI:88107   | Atp1a3        | 7  |
| MGI:88108   | Atp1b1        | 1  |
| MGI:88115   | Atp5a1        | 18 |
| MGI:107801  | Atp5b         | 10 |
| MGI:1261437 | Atp5c1        | 2  |



|             |          |    |
|-------------|----------|----|
| MGI:1918929 | Atp5h    | 11 |
| MGI:106341  | Atp5o    | 16 |
| MGI:1100495 | Atp5pb   | 3  |
| MGI:1201780 | Atp6v1a  | 16 |
| MGI:109618  | Atp6v1b2 | 8  |
| MGI:88138   | Bcl2     | 1  |
| MGI:88251   | Calm1    | 12 |
| MGI:103250  | Calm2    | 17 |
| MGI:103249  | Calm3    | 7  |
| MGI:88261   | Canx     | 11 |
| MGI:1931322 | Car13    | 3  |
| MGI:88269   | Car2     | 3  |
| MGI:107186  | Cct2     | 10 |
| MGI:104708  | Cct3     | 3  |
| MGI:107185  | Cct5     | 15 |
| MGI:1888996 | Cd59b    | 2  |
| MGI:106211  | Cdc42    | 4  |
| MGI:88354   | Cdh1     | 8  |
| MGI:88355   | Cdh2     | 18 |
| MGI:88407   | Ckb      | 12 |
| MGI:99441   | Ckmt1    | 2  |
| MGI:105061  | Clcn2    | 16 |
| MGI:1276112 | Cldn5    | 16 |
| MGI:2388633 | Cltc     | 11 |
| MGI:1917505 | Cnrip1   | 11 |
| MGI:88439   | Cntf     | 19 |
| MGI:105980  | Cntn1    | 15 |
| MGI:88474   | Cox5a    | 9  |
| MGI:88475   | Cox5b    | 1  |
| MGI:103099  | Cox6a1   | 5  |
| MGI:88516   | Cryab    | 9  |
| MGI:1339753 | Csf1     | 3  |
| MGI:1339758 | Csf1r    | 18 |
| MGI:105303  | Cxcr2    | 1  |
| MGI:88578   | Cycs     | 6  |
| MGI:2385311 | Dlat     | 9  |
| MGI:107450  | Dld      | 12 |
| MGI:107231  | Dlg1     | 16 |
| MGI:1926170 | Dlst     | 12 |
| MGI:107384  | Dnm1     | 2  |
| MGI:1349763 | Dpysl2   | 14 |
| MGI:1096881 | Eef1a1   | 9  |
| MGI:1096317 | Eef1a2   | 2  |
| MGI:1341878 | Ehd1     | 19 |
| MGI:1928900 | Ehd3     | 17 |
| MGI:108090  | Ei24     | 9  |
| MGI:1341830 | Eif2ak3  | 6  |

|             |               |    |
|-------------|---------------|----|
| MGI:95387   | Emx1          | 6  |
| MGI:95393   | Eno1          | 4  |
| MGI:95394   | Eno2          | 6  |
| MGI:1100494 | Ercc6         | 14 |
| MGI:1925017 | Ermn          | 2  |
| MGI:107940  | Ezh2          | 6  |
| MGI:98931   | Ezr           | 17 |
| MGI:109324  | Fadd          | 7  |
| MGI:1352745 | Fscn1         | 5  |
| MGI:95636   | Galc          | 12 |
| MGI:95640   | Gapdh         | 6  |
| MGI:99846   | Gdi1          | X  |
| MGI:99845   | Gdi2          | 13 |
| MGI:95697   | Gfap          | 11 |
| MGI:95719   | Gjb1          | X  |
| MGI:2153060 | Gjc2          | 11 |
| MGI:2153041 | Gjc3          | 5  |
| MGI:95739   | Glul          | 1  |
| MGI:95775   | Gnao1         | 8  |
| MGI:95781   | Gnb1          | 4  |
| MGI:95784   | Gnb2          | 5  |
| MGI:104581  | Gnb4          | 3  |
| MGI:101848  | Gnb5          | 9  |
| MGI:95792   | Got2          | 8  |
| MGI:95797   | Gpi1          | 7  |
| MGI:107672  | Gpm6b         | X  |
| MGI:3584514 | Gpr17         | 18 |
| MGI:95851   | Gsn           | 2  |
| MGI:95860   | Gstm1         | 3  |
| MGI:1342273 | Gsto1         | 19 |
| MGI:104735  | Gt(ROSA)26Sor | 6  |
| MGI:96015   | Hba-a1        | 11 |
| MGI:96021   | Hbb-b1        | 7  |
| MGI:1920177 | Hepacam       | 9  |
| MGI:1338076 | Hivep2        | 10 |
| MGI:96174   | Hoxa2         | 6  |
| MGI:96183   | Hoxb2         | 11 |
| MGI:2139279 | Hrh3          | 2  |
| MGI:96250   | Hsp90aa1      | 12 |
| MGI:96243   | Hspa2         | 12 |
| MGI:95835   | Hspa5         | 2  |
| MGI:105384  | Hspa8         | 9  |
| MGI:96245   | Hspa9         | 18 |
| MGI:96242   | Hspd1         | 1  |
| MGI:96067   | Htt           | 5  |
| MGI:1915084 | Idh3a         | 9  |
| MGI:96433   | Igf1r         | 7  |

|             |          |    |
|-------------|----------|----|
| MGI:2154090 | Igsf8    | 1  |
| MGI:96543   | Ii1b     | 2  |
| MGI:1923864 | Immt     | 6  |
| MGI:96568   | Ina      | 19 |
| MGI:1928268 | Ireb2    | 9  |
| MGI:96610   | Itgb1    | 8  |
| MGI:99418   | Itpr2    | 6  |
| MGI:96624   | Itpr3    | 17 |
| MGI:1933825 | Jam3     | 9  |
| MGI:107501  | Kcnj11   | 7  |
| MGI:1098226 | Kif14    | 1  |
| MGI:1343166 | Klk6     | 7  |
| MGI:2384968 | L2hgdh   | 12 |
| MGI:96763   | Ldhb     | 6  |
| MGI:109152  | Lig3     | 11 |
| MGI:102682  | Llgl1    | 11 |
| MGI:95794   | Lrp2     | 2  |
| MGI:96892   | Lyn      | 4  |
| MGI:1920994 | Man2c1   | 9  |
| MGI:1346866 | Map2k1   | 9  |
| MGI:2446166 | Marveld2 | 13 |
| MGI:96925   | Mbp      | 18 |
| MGI:97051   | Mdh1     | 11 |
| MGI:97050   | Mdh2     | 5  |
| MGI:3606200 | Mgat5b   | 11 |
| MGI:96982   | Mif      | 10 |
| MGI:2157910 | Mlc1     | 15 |
| MGI:97005   | Mmp12    | 9  |
| MGI:97011   | Mmp9     | 2  |
| MGI:1343489 | Mpdz     | 4  |
| MGI:1927339 | Mpp5     | 12 |
| MGI:103177  | Mpz      | 1  |
| MGI:97167   | Msn      | X  |
| MGI:1919210 | Myh14    | 7  |
| MGI:107728  | Myo1d    | 11 |
| MGI:1202864 | Myoc     | 1  |
| MGI:104563  | Napa     | 7  |
| MGI:104562  | Napb     | 2  |
| MGI:104561  | Napg     | 18 |
| MGI:97281   | Ncam1    | 9  |
| MGI:2444888 | Ncmap    | 4  |
| MGI:1341799 | Ndrp1    | 15 |
| MGI:1914523 | Ndufa10  | 1  |
| MGI:2443241 | Ndufs1   | 1  |
| MGI:1915599 | Ndufs3   | 2  |
| MGI:1920150 | Ndufv2   | 17 |
| MGI:97309   | Nefh     | 11 |

|             |         |    |
|-------------|---------|----|
| MGI:97313   | Nefl    | 14 |
| MGI:97314   | Nefm    | 14 |
| MGI:104753  | Nfasc   | 1  |
| MGI:97355   | Nme1    | 11 |
| MGI:97356   | Nme2    | 11 |
| MGI:104327  | Nog     | 11 |
| MGI:97361   | Nos2    | 11 |
| MGI:104560  | Nsf     | 11 |
| MGI:1345181 | Pacsin1 | 17 |
| MGI:2135608 | Pard3   | 8  |
| MGI:1333753 | Pdcd6ip | 9  |
| MGI:97530   | Pdgfra  | 5  |
| MGI:97532   | Pdha1   | X  |
| MGI:95834   | Pdia3   | 2  |
| MGI:1344408 | Pebp1   | 5  |
| MGI:1098808 | Pex5    | 6  |
| MGI:97552   | Pgam1   | 19 |
| MGI:97572   | Phb     | 11 |
| MGI:1355330 | Phgdh   | 3  |
| MGI:99887   | Pitpna  | 11 |
| MGI:97591   | Pkm     | 9  |
| MGI:97613   | Plcb1   | 2  |
| MGI:1915051 | Plip    | 8  |
| MGI:107685  | Plxna1  | 6  |
| MGI:102667  | Pmp2    | 3  |
| MGI:97631   | Pmp22   | 11 |
| MGI:1891698 | Pnkp    | 7  |
| MGI:97749   | Ppia    | 11 |
| MGI:99523   | Prdx1   | 4  |
| MGI:109486  | Prdx2   | 8  |
| MGI:88034   | Prdx3   | 19 |
| MGI:1336167 | Prkab1  | 5  |
| MGI:99260   | Prkci   | 3  |
| MGI:97602   | Prkcz   | 4  |
| MGI:108176  | Prx     | 7  |
| MGI:1913719 | Prxl2b  | 4  |
| MGI:97810   | Ptprc   | 1  |
| MGI:1927243 | Rala    | 13 |
| MGI:97852   | Rap1a   | 3  |
| MGI:97887   | Rdx     | 9  |
| MGI:1925544 | Rps27a  | 11 |
| MGI:1915835 | Rtn4    | 11 |
| MGI:2150641 | S1pr5   | 9  |
| MGI:2145950 | Scrib   | 15 |
| MGI:1914195 | Sdha    | 13 |
| MGI:97298   | Sept2   | 1  |
| MGI:1270156 | Sept4   | 11 |

|             |          |    |
|-------------|----------|----|
| MGI:1335094 | Sept7    | 9  |
| MGI:894310  | Sept8    | 11 |
| MGI:2444223 | Serinc5  | 13 |
| MGI:1924105 | Slc17a5  | 9  |
| MGI:1926080 | Slc25a12 | 2  |
| MGI:1353498 | Slc25a3  | 10 |
| MGI:1353495 | Slc25a4  | 8  |
| MGI:1353496 | Slc25a5  | X  |
| MGI:1328366 | Smarcb1  | 10 |
| MGI:98331   | Snap25   | 2  |
| MGI:98351   | Sod1     | 16 |
| MGI:98352   | Sod2     | 17 |
| MGI:98386   | Sptan1   | 2  |
| MGI:98400   | Srd5a1   | 13 |
| MGI:109130  | Stip1    | 19 |
| MGI:893577  | Stx4a    | 7  |
| MGI:107363  | Stxbp1   | 2  |
| MGI:1306775 | Sucla2   | 14 |
| MGI:98460   | Syn1     | X  |
| MGI:103020  | Syn2     | 6  |
| MGI:1926784 | Tagln3   | 16 |
| MGI:98535   | Tcp1     | 17 |
| MGI:1202709 | Tert     | 13 |
| MGI:98747   | Thy1     | 9  |
| MGI:105992  | Tkt      | 14 |
| MGI:1920198 | Tppp     | 13 |
| MGI:98821   | Trf      | 9  |
| MGI:98869   | Tuba1a   | 15 |
| MGI:107804  | Tuba1b   | 15 |
| MGI:107848  | Tubb4a   | 17 |
| MGI:1915472 | Tubb4b   | 2  |
| MGI:1923686 | Tufm     | 7  |
| MGI:1277211 | Tyrobp   | 7  |
| MGI:98887   | Uba52    | 8  |
| MGI:98888   | Ubb      | 11 |
| MGI:98889   | Ubc      | 5  |
| MGI:103149  | Uchl1    | 5  |
| MGI:109522  | Ugt8a    | 3  |
| MGI:107876  | Uqcrc1   | 9  |
| MGI:1914253 | Uqcrc2   | 7  |
| MGI:1913944 | Uqcrfs1  | 13 |
| MGI:99919   | Vcp      | 4  |
| MGI:106919  | Vdac1    | 11 |
| MGI:106915  | Vdac2    | 14 |
| MGI:103557  | Xpc      | 6  |
| MGI:108109  | Ywhag    | 5  |
| MGI:1929704 | Zfp24    | 18 |

|             |                      |    |
|-------------|----------------------|----|
| MGI:96613   | Itgb4                | 11 |
| MGI:2443039 | Arid5a               | 1  |
| MGI:2387643 | B9d2                 | 7  |
| MGI:1859147 | Batf                 | 12 |
| MGI:88139   | Bcl2l1               | 2  |
| MGI:1891828 | Becn1                | 11 |
| MGI:88216   | Btk                  | X  |
| MGI:1097680 | C3ar1                | 6  |
| MGI:96544   | Casp1                | 9  |
| MGI:107700  | Casp4                | 9  |
| MGI:98259   | Ccl2                 | 11 |
| MGI:104618  | Ccr1                 | 9  |
| MGI:106185  | Ccr2                 | 9  |
| MGI:1333797 | Ccr6                 | 17 |
| MGI:1201402 | Ccr8                 | 9  |
| MGI:2183926 | Cd276                | 9  |
| MGI:88327   | Cd28                 | 1  |
| MGI:88338   | Cd44                 | 2  |
| MGI:88340   | Cd5                  | 19 |
| MGI:96534   | Cd74                 | 18 |
| MGI:101775  | Cd80                 | 16 |
| MGI:101773  | Cd86                 | 16 |
| MGI:108445  | Ciita                | 16 |
| MGI:1298389 | Clec4d               | 6  |
| MGI:1861232 | Clec4e               | 6  |
| MGI:88496   | Crh                  | 3  |
| MGI:1339752 | Csf2                 | 11 |
| MGI:1333815 | Cx3cr1               | 9  |
| MGI:5582466 | Del(3Cd1d2-Cd1d1)1Cw | 3  |
| MGI:1921396 | Dock8                | 19 |
| MGI:1345096 | Eae18                | 18 |
| MGI:5642066 | Eae42                | 3  |
| MGI:1345095 | Eae44b               | 11 |
| MGI:1309484 | Eae7                 | 11 |
| MGI:1309473 | Eae9                 | 9  |
| MGI:1100851 | Elavl1               | 8  |
| MGI:1096338 | Ephb6                | 6  |
| MGI:95484   | Fas                  | 19 |
| MGI:95496   | Fcer1g               | 1  |
| MGI:95500   | Fcgr3                | 1  |
| MGI:1891436 | Foxp3                | X  |
| MGI:95709   | Ghrh                 | 2  |
| MGI:95710   | Ghrhr                | 6  |
| MGI:2685222 | Gpr174               | X  |
| MGI:103070  | H2-Ab1               | 17 |
| MGI:95921   | H2-DMa               | 17 |
| MGI:95957   | H2-T23               | 17 |

|             |         |    |
|-------------|---------|----|
| MGI:95894   | H2      |    |
| MGI:96537   | Il10    | 1  |
| MGI:96539   | Il12a   | 3  |
| MGI:96541   | Il13    | 11 |
| MGI:107364  | Il17a   | 1  |
| MGI:2446486 | Il17c   | 8  |
| MGI:2676631 | Il17f   | 1  |
| MGI:2159336 | Il17rc  | 6  |
| MGI:96542   | Il1a    | 2  |
| MGI:1890474 | Il21    | 3  |
| MGI:1932410 | Il23a   | 10 |
| MGI:2181693 | Il23r   | 6  |
| MGI:96559   | Il6     | 5  |
| MGI:107420  | Irak1   | X  |
| MGI:96590   | Irf1    | 11 |
| MGI:96609   | Irgax   | 7  |
| MGI:104797  | Lta     | 17 |
| MGI:104798  | Tnf     | 17 |
| MGI:2154405 | Map4k3  | 17 |
| MGI:1338024 | Mapk11  | 15 |
| MGI:1346865 | Mapk14  | 17 |
| MGI:2676840 | Mir155  | 16 |
| MGI:5451075 | Mirc33  | 6  |
| MGI:108005  | Myd88   | 9  |
| MGI:97283   | Ncf1    | 5  |
| MGI:1890645 | Nek7    | 1  |
| MGI:102469  | Nfatc1  | 18 |
| MGI:1196617 | Ninj1   | 13 |
| MGI:2444084 | Nlrp10  | 7  |
| MGI:2653833 | Nlrp3   | 11 |
| MGI:104879  | Pdcd1   | 1  |
| MGI:107490  | Pdcd4   | 19 |
| MGI:1195256 | Pla2g4a | 1  |
| MGI:97601   | Prkcq   | 2  |
| MGI:104673  | Ptpn12  | 5  |
| MGI:97897   | Rel     | 11 |
| MGI:1923688 | Rftn1   | 17 |
| MGI:104856  | Rorc    | 3  |
| MGI:5313387 | Rr17    | 1  |
| MGI:1096355 | S1pr1   | 3  |
| MGI:1261415 | Sgpl1   | 10 |
| MGI:1338802 | Shcbp1  | 8  |
| MGI:1889206 | Skap2   | 6  |
| MGI:105305  | Slc1a5  | 7  |
| MGI:1100518 | Smad7   | 18 |
| MGI:1354910 | Socs1   | 16 |
| MGI:98384   | Spn     | 7  |

|             |          |    |
|-------------|----------|----|
| MGI:2138162 | Stk17b   | 1  |
| MGI:1888984 | Tbx21    | 11 |
| MGI:1932389 | Tlr9     | 9  |
| MGI:1314884 | Tnfrsf1a | 6  |
| MGI:2180140 | Tnfsf15  | 4  |
| MGI:102749  | Trim25   | 11 |
| MGI:101857  | Usp15    | 10 |
| MGI:99180   | Zfp36    | 7  |
| MGI:106441  | Zranb1   | 7  |
| MGI:104738  | Cdkn2a   | 4  |
| MGI:1352629 | Abcc8    | 7  |
| MGI:88068   | Areg     | 5  |
| MGI:96920   | Ascl2    | 7  |
| MGI:104783  | Atxn1    | 13 |
| MGI:104737  | Cdkn2b   | 4  |
| MGI:1924143 | Cers2    | 3  |
| MGI:88494   | Creb1    | 1  |
| MGI:1097153 | Cx3cl1   | 8  |
| MGI:94865   | Dbi      | 1  |
| MGI:101941  | E2f1     | 2  |
| MGI:1341085 | Epm2a    | 10 |
| MGI:1096867 | Etv5     | 16 |
| MGI:96414   | Idh2     | 7  |
| MGI:107656  | Ifng     | 10 |
| MGI:1924375 | Il33     | 19 |
| MGI:104993  | Lepr     | 4  |
| MGI:2180197 | Lgi4     | 7  |
| MGI:97250   | Myc      | 15 |
| MGI:97307   | Nf2      | 11 |
| MGI:1891916 | Plag1    | 4  |
| MGI:104872  | Ppp1cc   | 5  |
| MGI:97600   | Prkch    | 12 |
| MGI:95481   | Ptk2     | 15 |
| MGI:1859162 | Rnf10    | 5  |
| MGI:98310   | Ski      | 4  |
| MGI:98359   | Sox11    | 12 |
| MGI:98366   | Sox4     | 13 |
| MGI:1913150 | Trem2    | 17 |
| MGI:88222   | Tspo     | 15 |
| MGI:1914740 | Ufl1     | 4  |
| MGI:98932   | Vim      | 2  |
| MGI:1349215 | Abcd1    | X  |
| MGI:1933548 | Actl6b   | 5  |
| MGI:1340046 | Adam22   | 5  |
| MGI:1916151 | Adgrg6   | 10 |
| MGI:1338803 | Aire     | 10 |
| MGI:88059   | App      | 16 |



|             |                      |    |
|-------------|----------------------|----|
| MGI:88077   | Arsa                 | 15 |
| MGI:1354710 | Atp8a2               | 14 |
| MGI:1341628 | Atrn                 | 2  |
| MGI:1346542 | Bace1                | 9  |
| MGI:1929813 | Cacna2d2             | 9  |
| MGI:2137858 | Cadm3                | 1  |
| MGI:2449088 | Cadm4                | 7  |
| MGI:1289263 | Ccdc39               | 3  |
| MGI:1096320 | Ccr10                | 11 |
| MGI:88319   | Cd19                 | 7  |
| MGI:2442359 | Cd300lf              | 11 |
| MGI:107899  | Cd36                 | 5  |
| MGI:88335   | Cd4                  | 6  |
| MGI:109177  | Cd59a                | 2  |
| MGI:88346   | Cd8a                 | 6  |
| MGI:2443629 | Cemip                | 7  |
| MGI:1914256 | Cisd2                | 3  |
| MGI:2159324 | Cln6                 | 9  |
| MGI:1349447 | Cln8                 | 8  |
| MGI:88467   | Col1a1               | 11 |
| MGI:1915164 | Coq9                 | 8  |
| MGI:88476   | Cp                   | 3  |
| MGI:1352450 | Cxcl10               | 5  |
| MGI:1334257 | Cyth1                | 11 |
| MGI:1334255 | Cyth2                | 7  |
| MGI:109247  | Ddit3                | 10 |
| MGI:1921997 | Ddit4                | 10 |
| MGI:2445096 | Dhtkd1               | 2  |
| MGI:3852176 | Dp(XTceal3-Plp1)1Gmh | X  |
| MGI:5696872 | Dpmy                 | 10 |
| MGI:107432  | Drp2                 | X  |
| MGI:104627  | Dst                  | 1  |
| MGI:1891336 | Eae14                | 8  |
| MGI:2148760 | Eae19                | 19 |
| MGI:2148761 | Eae20                | 3  |
| MGI:1931001 | Edaradd              | 13 |
| MGI:95296   | Egr2                 | 10 |
| MGI:103008  | Epb41l3              | 17 |
| MGI:95411   | Erbp3                | 10 |
| MGI:104771  | Erbp4                | 1  |
| MGI:1890169 | Erbin                | 13 |
| MGI:99255   | Fasl                 | 1  |
| MGI:102706  | Fdft1                | 14 |
| MGI:1316726 | Fga                  | 3  |
| MGI:2183747 | Fgd4                 | 16 |
| MGI:2143585 | Fig4                 | 10 |
| MGI:95602   | Fyn                  | 10 |

|             |         |    |
|-------------|---------|----|
| MGI:1860139 | Gabbr1  | 17 |
| MGI:1858277 | Gal3st1 | 11 |
| MGI:2449057 | Gars    | 6  |
| MGI:1338002 | Gdap1   | 1  |
| MGI:88151   | Glb1    | 9  |
| MGI:1343460 | Gnpat   | 8  |
| MGI:3643902 | Gnptab  | 10 |
| MGI:95813   | Grid2   | 6  |
| MGI:95896   | H2-D1   | 17 |
| MGI:96073   | Hexa    | 9  |
| MGI:96074   | Hexb    | 13 |
| MGI:1196620 | Hpn     | 7  |
| MGI:105089  | Hsd17b4 | 18 |
| MGI:96257   | Hspg2   | 4  |
| MGI:107657  | Ifnb1   | 4  |
| MGI:107655  | Ifngr1  | 10 |
| MGI:96461   | Igh-J   | 12 |
| MGI:96560   | Il6st   | 13 |
| MGI:96605   | Itga6   | 2  |
| MGI:102700  | Itga7   | 10 |
| MGI:96608   | Itgav   | 2  |
| MGI:99912   | Lama2   | 10 |
| MGI:109321  | Lama4   | 10 |
| MGI:99914   | Lamc1   | 1  |
| MGI:1342270 | Large1  | 8  |
| MGI:2138281 | Lbr     | 1  |
| MGI:1929512 | Litaf   | 16 |
| MGI:96794   | Lmna    | 3  |
| MGI:1891340 | Lpin1   | 12 |
| MGI:892970  | Mal     | 2  |
| MGI:1306778 | Map1b   | 13 |
| MGI:96994   | ml      | UN |
| MGI:106207  | Mnat1   | 12 |
| MGI:1924366 | Mtmr2   | 9  |
| MGI:107564  | Nab1    | 1  |
| MGI:107563  | Nab2    | 10 |
| MGI:3579046 | nmf161  | UN |
| MGI:1097712 | Npc1    | 18 |
| MGI:1352463 | Nr1h2   | 7  |
| MGI:1352462 | Nr1h3   | 2  |
| MGI:104750  | Nrcam   | 12 |
| MGI:1201386 | Nrd1    | 4  |
| MGI:1921393 | Opa1    | 16 |
| MGI:1321392 | Pex7    | 10 |
| MGI:101896  | Pou3f1  | 4  |
| MGI:101895  | Pou3f2  | 4  |
| MGI:101884  | Ppard   | 17 |

|             |               |    |
|-------------|---------------|----|
| MGI:2139740 | Ppm1l         | 3  |
| MGI:97551   | Prf1          | 10 |
| MGI:97783   | Psap          | 10 |
| MGI:99511   | Ptpn11        | 5  |
| MGI:96055   | Ptpn6         | 6  |
| MGI:97813   | Ptpre         | 7  |
| MGI:97848   | Rag1          | 2  |
| MGI:97849   | Rag2          | 2  |
| MGI:1098827 | Reep1         | 6  |
| MGI:1196458 | Scarb2        | 5  |
| MGI:103169  | Scn8a         | 15 |
| MGI:1931787 | Scyl1         | 19 |
| MGI:1921385 | Scyl3         | 1  |
| MGI:2444417 | Sh3tc2        | 18 |
| MGI:2135960 | Slc12a6       | 2  |
| MGI:1332247 | Slc33a1       | 3  |
| MGI:1890574 | Sptbn4        | 7  |
| MGI:107476  | Stim1         | 7  |
| MGI:2151156 | Stim2         | 5  |
| MGI:96739   | Stmn1         | 4  |
| MGI:5776518 | tbyl          | 18 |
| MGI:98733   | Tg            | 15 |
| MGI:1920416 | Tm7sf2        | 19 |
| MGI:1891239 | Tmevd5        | 11 |
| MGI:2669608 | Tmevd6        | 1  |
| MGI:2669609 | Tmevd7        | 5  |
| MGI:2669610 | Tmevd8        | 15 |
| MGI:2669611 | Tmevd9        | 1  |
| MGI:1336194 | Tpp1          | 7  |
| MGI:1929183 | Tsc1          | 2  |
| MGI:6307725 | tsl           | 11 |
| MGI:1332243 | Ugcg          | 4  |
| MGI:2178798 | Vps54         | 11 |
| MGI:1914438 | 2700046G09Rik | 19 |
| MGI:1349467 | Abcd2         | 15 |
| MGI:1913440 | Acer3         | 7  |
| MGI:87986   | Akt1          | 12 |
| MGI:104874  | Akt2          | 7  |
| MGI:2653612 | Amigo1        | 3  |
| MGI:2444453 | Arhgef10      | 8  |
| MGI:1924210 | Bcas1         | 2  |
| MGI:88348   | Cd9           | 6  |
| MGI:2447167 | Cmtm8         | 9  |
| MGI:1298217 | Cst7          | 2  |
| MGI:109553  | Ctsc          | 7  |
| MGI:2149839 | Fam126a       | 5  |
| MGI:1194891 | Gpc1          | 1  |

|             |          |    |
|-------------|----------|----|
| MGI:96079   | Hgf      | 5  |
| MGI:1195267 | Ilk      | 7  |
| MGI:1346053 | Kel      | 6  |
| MGI:1343327 | Klk8     | 7  |
| MGI:2146021 | Mal2     | 15 |
| MGI:2385152 | Mall     | 2  |
| MGI:2147570 | Marveld1 | 19 |
| MGI:3619057 | Mir100   | 9  |
| MGI:2676823 | Mir138-1 | 9  |
| MGI:3618733 | Mir138-2 | 8  |
| MGI:2676825 | Mir140   | 8  |
| MGI:3629945 | Mir146b  | 19 |
| MGI:2676859 | Mir195a  | 11 |
| MGI:2676879 | Mir204   | 19 |
| MGI:2676898 | Mir23b   | 13 |
| MGI:2676899 | Mir24-1  | 13 |
| MGI:3618755 | Mir24-2  | 8  |
| MGI:2676903 | Mir27b   | 13 |
| MGI:2676907 | Mir30a   | 1  |
| MGI:3619352 | Mir338   | 11 |
| MGI:3619363 | Mir34a   | 4  |
| MGI:105976  | Myo5a    | 9  |
| MGI:97323   | Ngfr     | 11 |
| MGI:97380   | Ntf3     | 6  |
| MGI:97385   | Ntrk3    | 7  |
| MGI:1335106 | Pikfyve  | 1  |
| MGI:107172  | Ppp3r1   | 11 |
| MGI:97856   | Rara     | 11 |
| MGI:97857   | Rarb     | 14 |
| MGI:97858   | Rarg     | 15 |
| MGI:97896   | Reg2     | 6  |
| MGI:98214   | Rxra     | 2  |
| MGI:98215   | Rxrb     | 17 |
| MGI:98216   | Rxrg     | 1  |
| MGI:98217   | S100b    | 10 |
| MGI:1920212 | Tymp     | 15 |
| MGI:103569  | Xk       | X  |
| MGI:1289293 | Zkscan6  | 11 |
| MGI:1330262 | Zpr1     | 9  |

---

## Supplementary figure 1

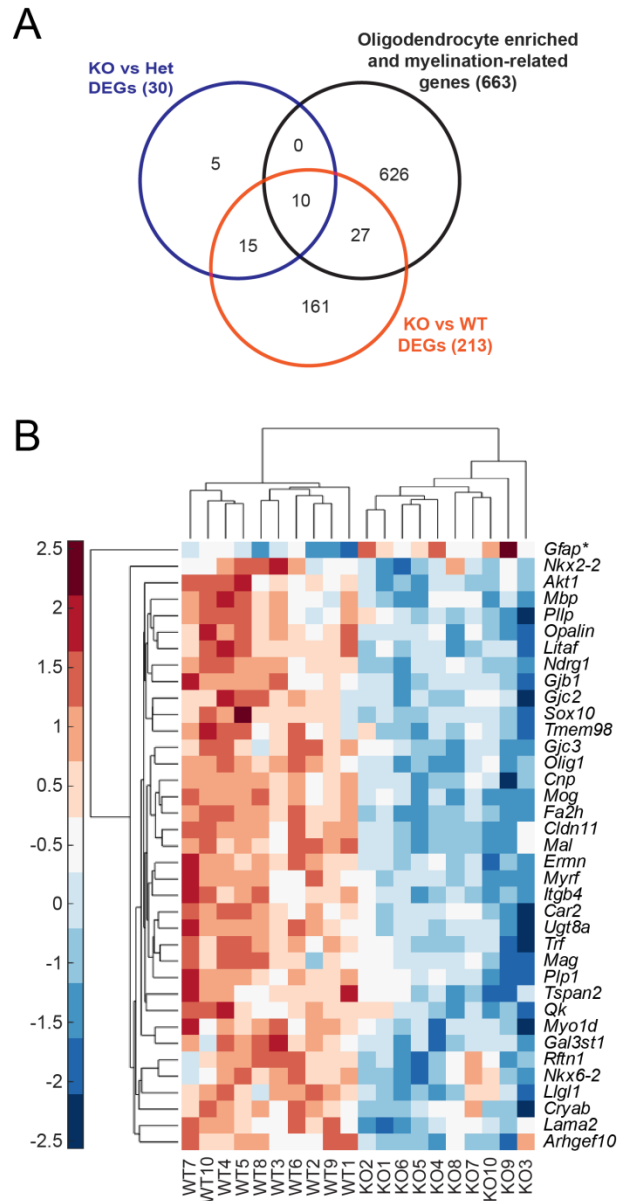

**Supplementary Figure 1. DEGs in *Tmem106b*<sup>-/-</sup> mice overlap with myelination-related genes.** (A) Venn diagram shows the overlap of DEGs of *Tmem106b*<sup>-/-</sup> (KO) vs *Tmem106b*<sup>+/-</sup> (Het), DEGs of *Tmem106b*<sup>-/-</sup> (KO) vs *Tmem106b*<sup>+/+</sup> (WT), and oligodendrocyte enriched and myelination-related genes (for detailed gene list, see Supplementary Table 3). (B) Hierarchical clustering of 37 overlapping genes between DEGs of KO vs WT mice and oligodendrocyte-enriched and myelination-related genes. \* indicates the only upregulated gene.

## Supplementary Figure 2

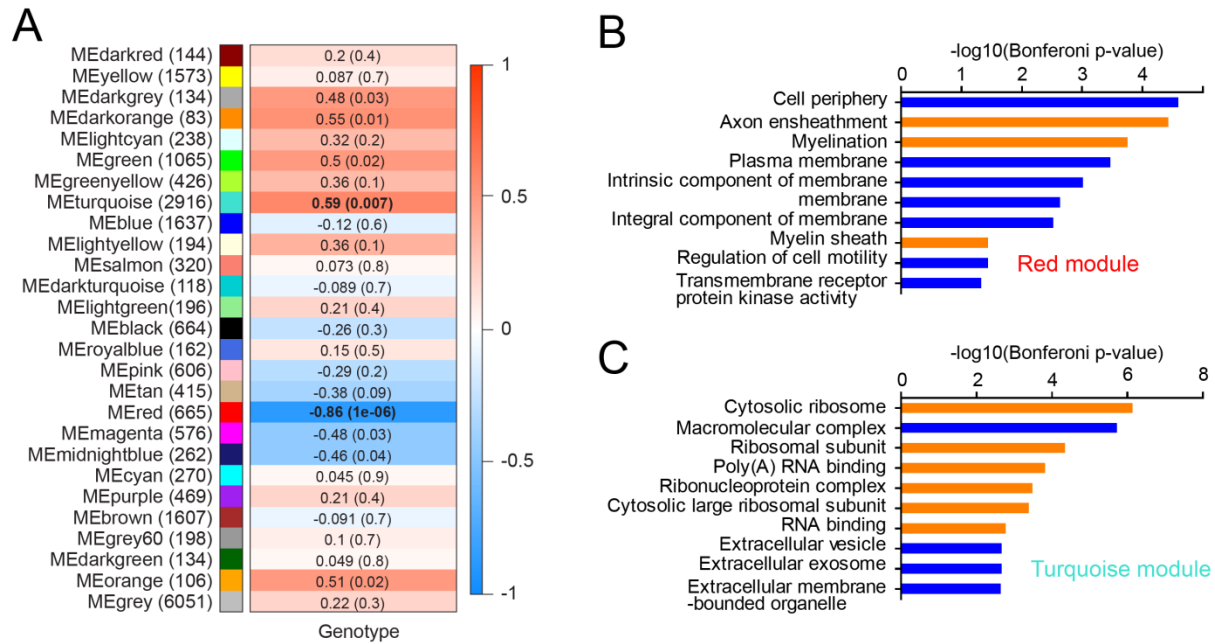

**Supplementary Figure 2. Weighted gene co-expression network analysis (WGCNA) confirms myelination deficits in *Tmem106b*<sup>-/-</sup> mice.** (A) Module-trait relationships are plotted for *Tmem106b*<sup>+/+</sup> (WT) and *Tmem106b*<sup>-/-</sup> (KO) mice. These plots are generated with WGCNA for groups of genes that increase (red) or decrease (blue) together. A unique color has been assigned to each of these groups (modules). Correlations and p-values are shown with respect to the *Tmem106b* genotype (KO vs WT). On the left, the color of the module and the number of member genes in each of the 27 co-expression modules are shown. (B, C) Top 10 GO terms of the red (B) and turquoise (C) modules identified in A. Myelination-related (in B) and translation-related (in C) cellular processes are highlighted in yellow.

### Supplementary Figure 3

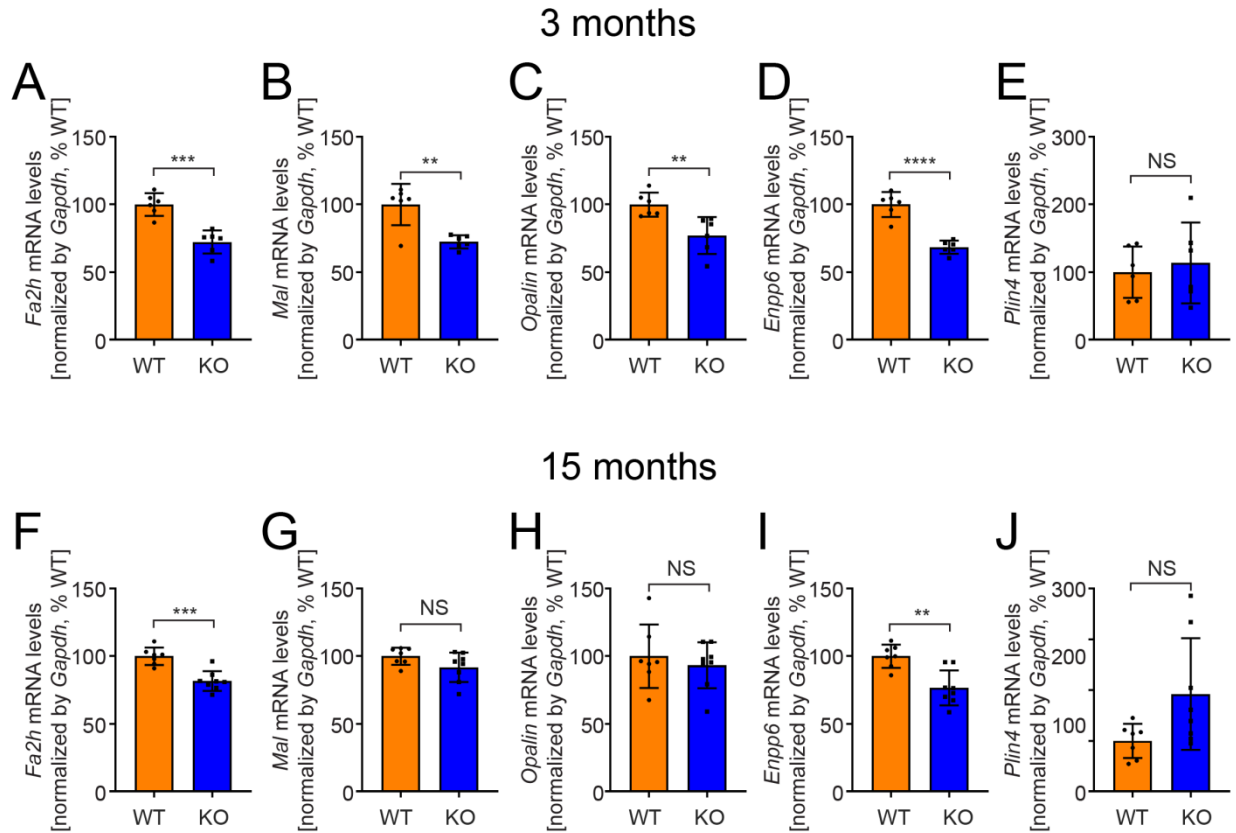

**Supplementary Figure 3. q-PCR validation of top down- and up-regulated DEGs identified in WT and *Tmem106b*<sup>-/-</sup> mice at different ages. (A-E) 3-month-old WT and *Tmem106b*<sup>-/-</sup> brains. (F-J) 15-month-old WT and *Tmem106b*<sup>-/-</sup> brains. Graphs represent the mean  $\pm$  S.E.M. Data was analyzed by Student's t-test (n=6-8 per group). NS, not significant, \* $p < 0.05$ , \*\* $p < 0.01$ , \*\*\* $p < 0.001$ , \*\*\*\* $p < 0.0001$ .**

## Supplementary Figure 4

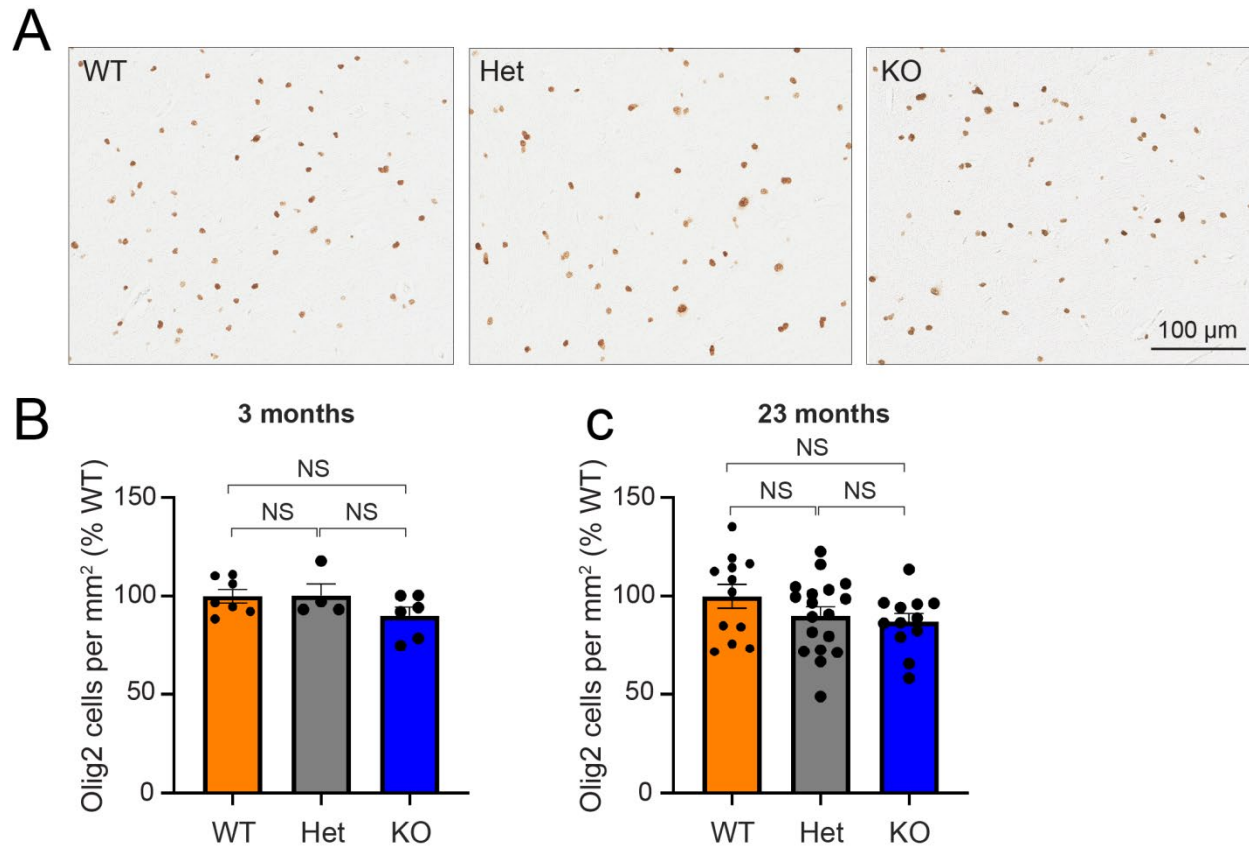

**Supplementary Figure 4. Olig2 positive cell counts in the cortex region of *Tmem106b* deficiency mice.** (A) Representative images of olig2 immunostaining in cortex of 3-month-old *Tmem106b*<sup>+/+</sup> (WT), *Tmem106b*<sup>+/-</sup> (Het), and *Tmem106b*<sup>-/-</sup> (KO) mouse brains. (B-F) Quantification of olig2 positive cells in the corpus callosum of the WT, Het, and KO mouse brains at indicated ages (n = 4-18 per group). The graph represents the mean  $\pm$  S.E.M. Data was analyzed by one-way analysis of variance (ANOVA) followed by Bonferroni's multiple comparison test. NS, no significant.



## Supplementary Figure 5

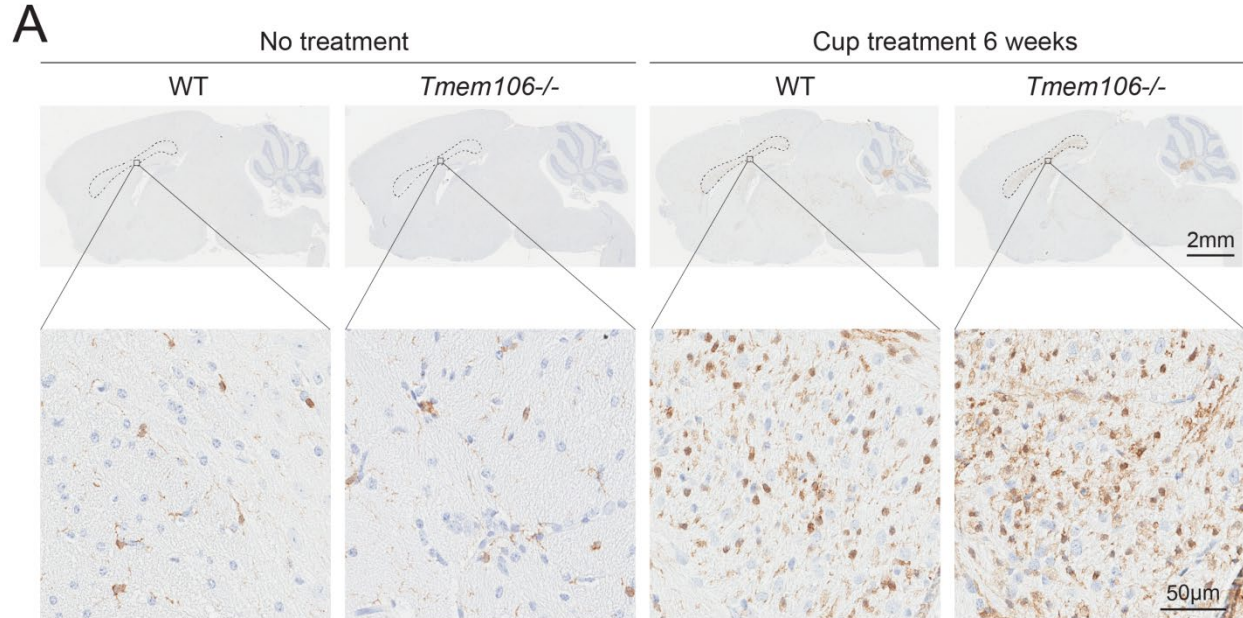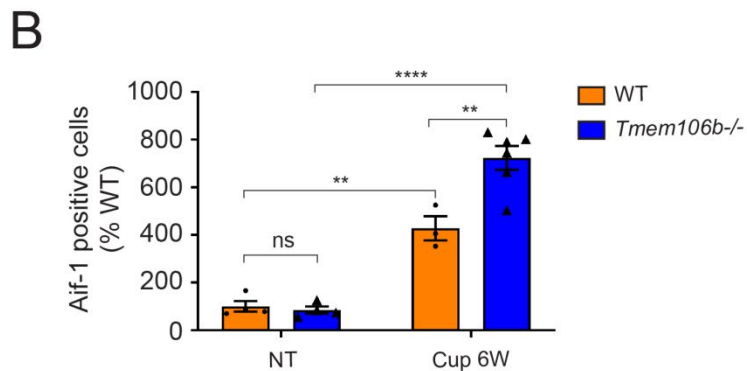

### Supplementary Figure 5. Loss of *Tmem106b* increased cuprizone-diet induced microgliosis

#### in corpus callosum. (A) Representative images of Aif-1(microglia marker) immunostaining of

brains from *Tmem106b*<sup>+/+</sup> (WT) and *Tmem106b*<sup>-/-</sup> after normal diet (No treatment) and 6 weeks of cuprizone diet treatment (Cup treatment 6 weeks). The corpus callosum was highlighted in dashed lines.

(B) Quantification of Aif-1 positive cells in the corpus callosum of the WT and *Tmem106b*<sup>-/-</sup> mouse brains in A (n=3-6 per group). The graph represents the mean ± S.E.M. Data was analyzed by Student's t-test. ns, no significant, \*\*p < 0.01,

\*\*\*p < 0.001.

Supplementary Figure 6

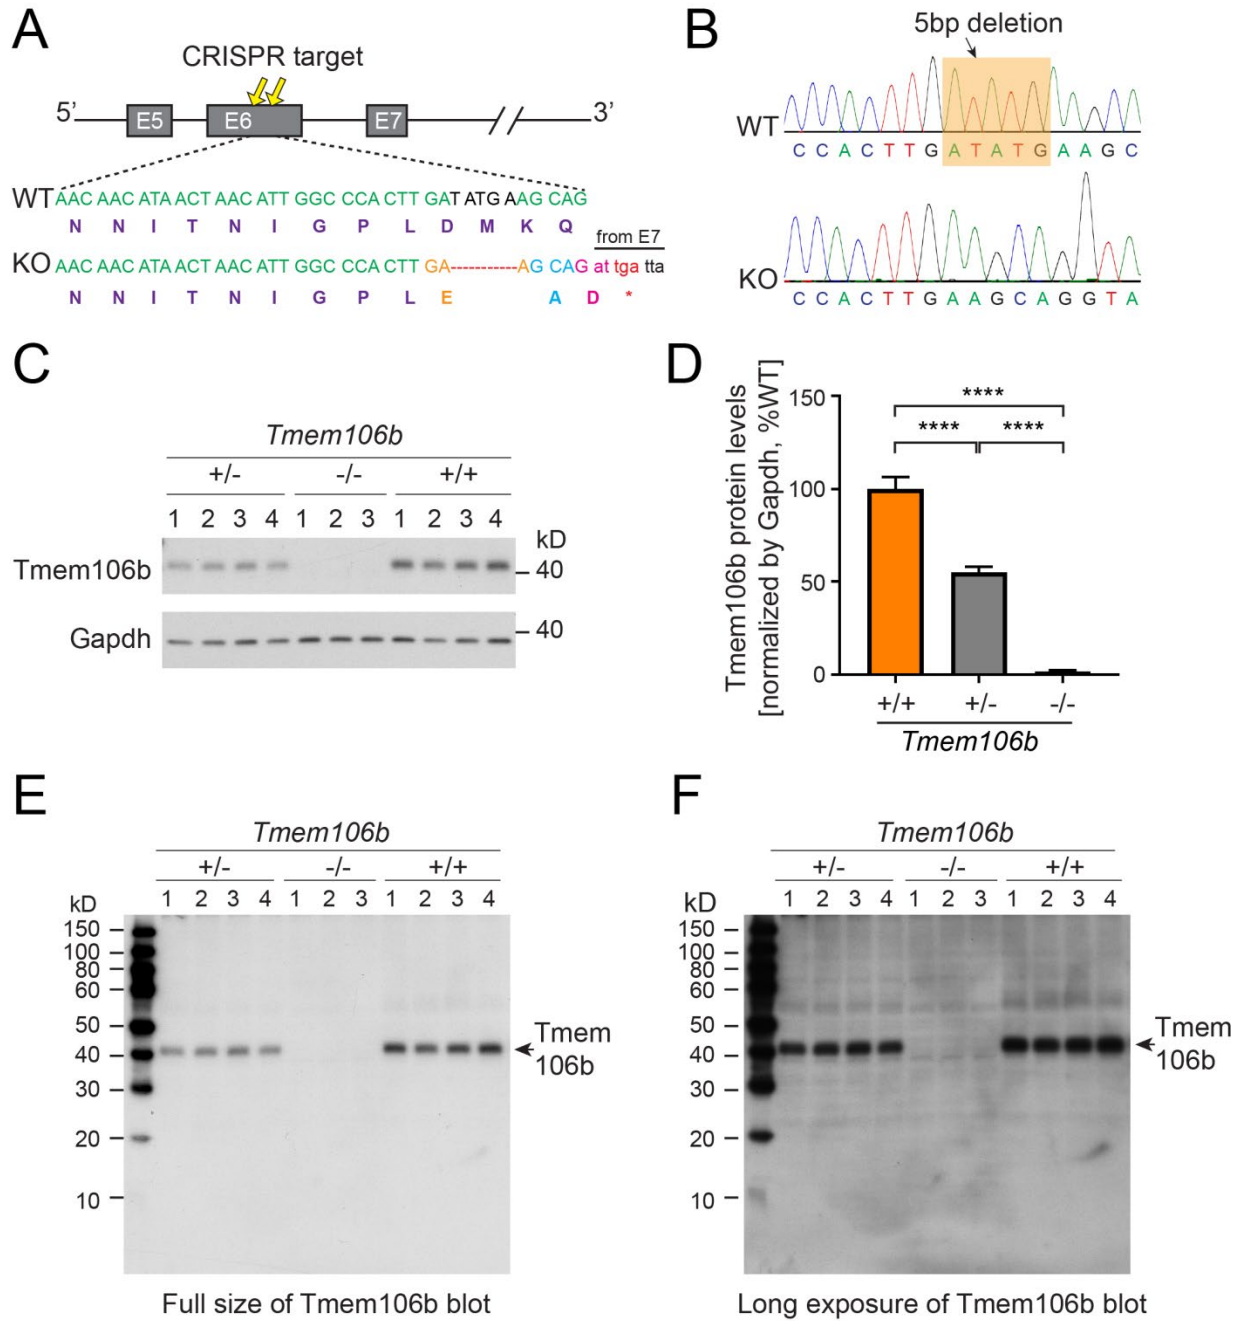

Supplementary Figure 6. Generation and characterization of *Tmem106b* CRISPR knock-out (KO) mice. (A) A diagram shows the generation of *Tmem106b* CRISPR KO mice. CRISPR guide RNA targets exon 6 of *Tmem106b* and deletes 5bp (TATGA, highlighted in black color)

leading to an immediate stop codon (\*). **(B)** Sanger sequencing traces and sequences of WT and *Tmem106b* CRISPR KO (KO). **(C)** Western blot confirms a complete loss of Tmem106b protein in *Tmem106b* CRISPR KO brain tissues. **(D)** Quantification of Tmem106b protein levels in the blots in C. Graph represents the mean  $\pm$  S.E.M. Data was analyzed by one-way analysis of variance (ANOVA) followed by Bonferroni's multiple comparison test (n=3-4). \*\*\*\*p < 0.0001. **(E, F)** a full blot (E) and a long exposure blot (F) of Tmem106b blot in C.

**Supplementary Figure 7**

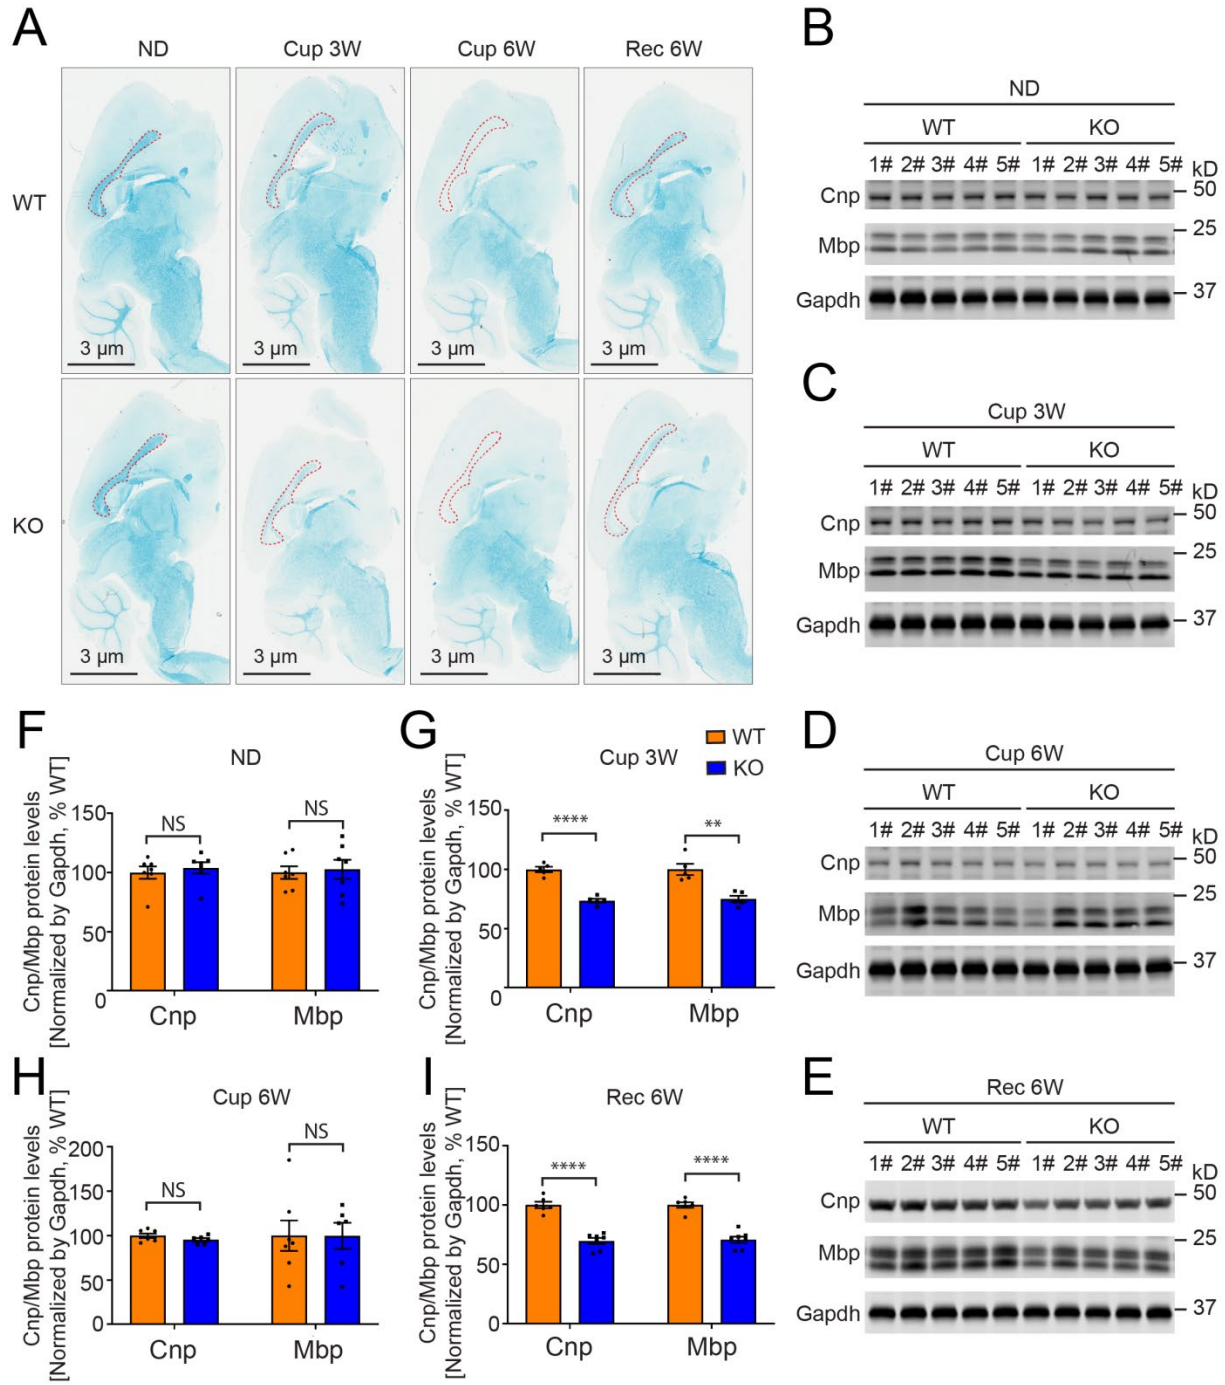

**Supplementary Figure 7. Increased de-myelination and reduced re-myelination in *Tmem106b* CRISPR KO mice in a cuprizone-induced de- and re-myelination mouse model.**

(A) Representative images of the Luxol fast blue (LFB) staining of corpus callosum from WT

and *Tmem106b* CRISPR KO mice treated with indicated diets: ND, normal diet; Cup 3W, 3 weeks of cuprizone diet, Cup 6W, 6 weeks of cuprizone diet, Rec 6W, 6 weeks of cuprizone diet plus 6 weeks of normal diet. **(B-E)** Western blots show protein levels of Cnp, Mbp, and Gapdh in WT and *Tmem106b* CRISPR KO (KO) mice treated with normal diet (ND, B), 3 weeks of cuprizone diet (Cup 3w, C), 6 weeks of cuprizone diet (Cup 6w, D), and 6 weeks of cuprizone diet plus 6 weeks of normal diet (Rec 6w, E), respectively. Unmodified full-length blots in Supplementary Figure 14. **(F-I)** Quantification of the blots in B-E, respectively. Graphs represent the mean  $\pm$  S.E.M. Data was analyzed by Student's t-test (n = 5-7 per group). NS, not significant, \*\*p < 0.01, \*\*\*\*p < 0.0001.

**Supplementary Figure 8**

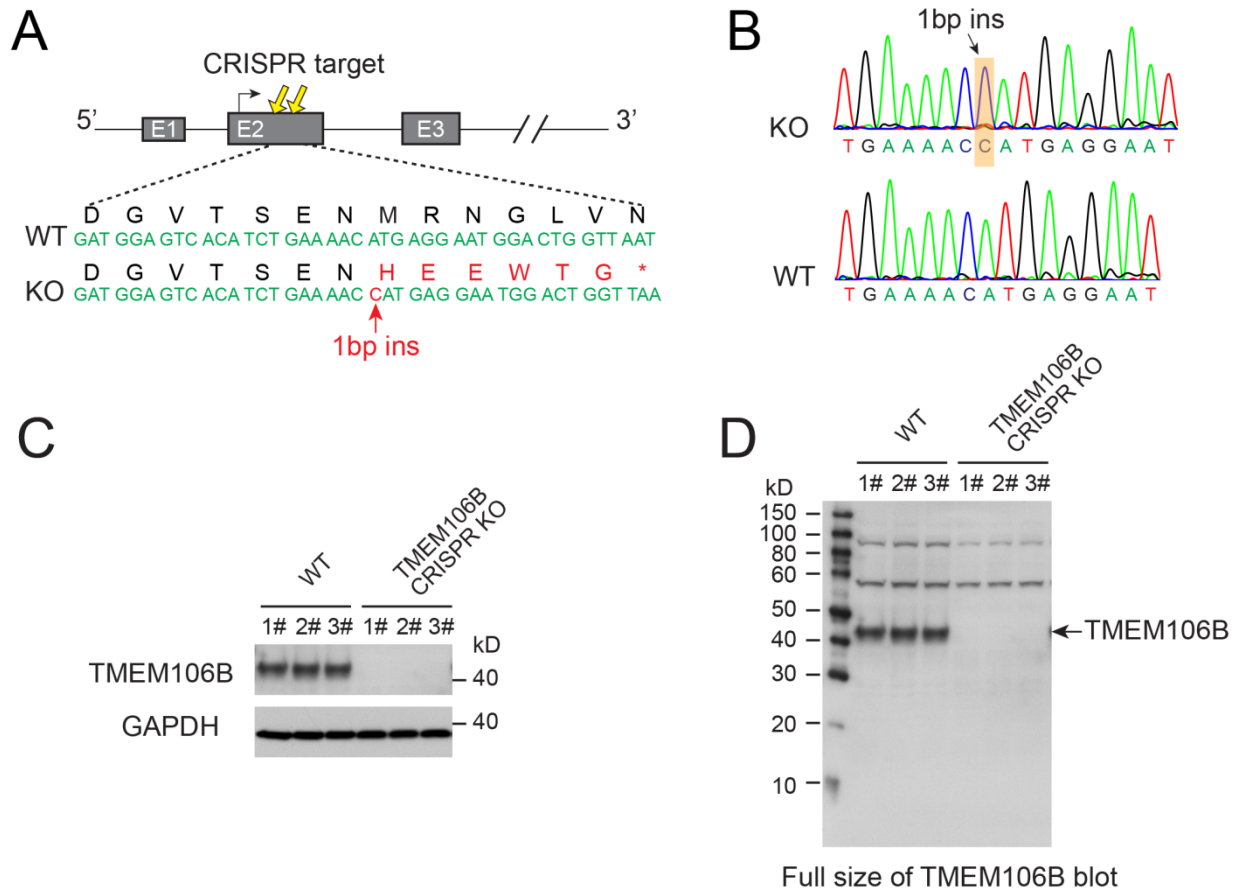

**Supplementary Figure 8. Generation and characterization of *TMEM106b* CRISPR knock-out (KO) HeLa cell line.** (A) Diagram shows the generation of *Tmem106b* CRISPR KO cells. CRISPR guide RNA targets the exon 1 of *TMEM106B* and inserts 1bp, highlighted in red color) leading to a stop codon (\*). (B) Sanger sequencing traces and sequences of WT and *TMEM106B* CRISPR KO (KO) cells. (C) Western blot confirms a complete loss of *TMEM106B* protein in *TMEM106B* CRISPR KO HeLa cells. (D) Full *TMEM106B* blot shows no residual *TMEM106B* fragments in the KO cells.

## Supplementary Figure 9

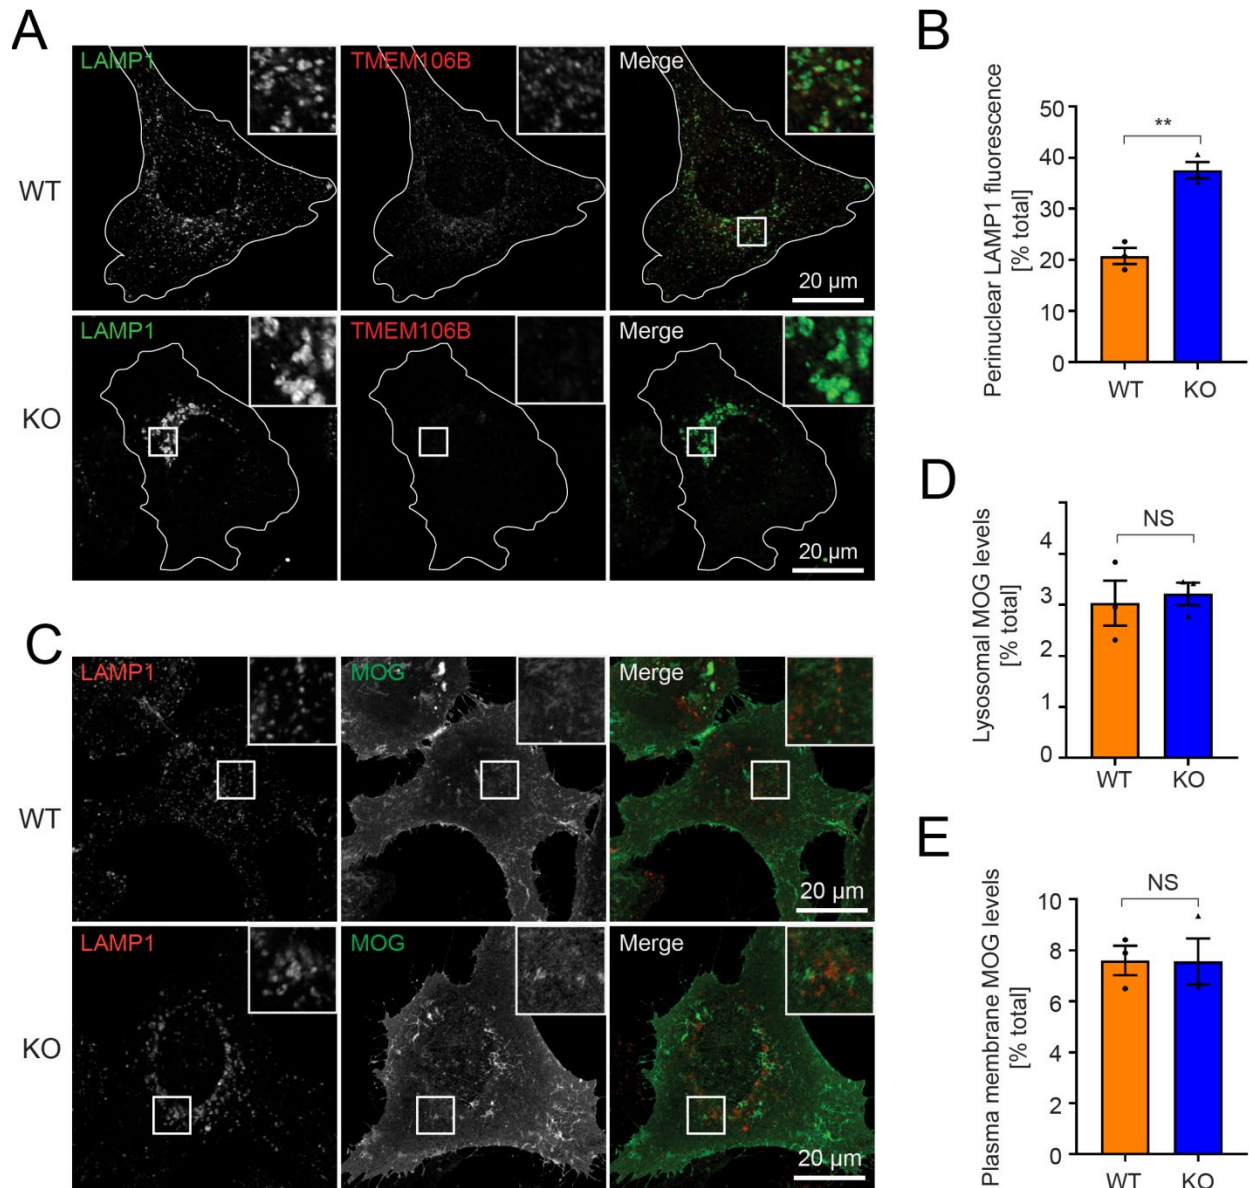

**Supplementary Figure 9. No effect of TMEM106B on MOG trafficking.** (A) Representative immunofluorescence staining images of LAMP1 and TMEM106B from WT HeLa and TMEM106B CRISPR KO (KO) HeLa cells. (B) Quantification of perinuclear-distributed LAMP1+ compartments. (C) Representative immunofluorescent images of LAMP1 and PLP1 from WT HeLa and TMEM106B CRISPR KO (KO) HeLa cells 24 h after MOG transfection. (D, E) Quantification of lysosomal (D) and plasma membrane (E) localized MOG in C. Graphs

in B, D, and E represent the mean  $\pm$  S.E.M. Data was analyzed by Student's t-test. NS, not significant, \*\* $p < 0.01$ , (n = 3).



Supplementary Figure 10

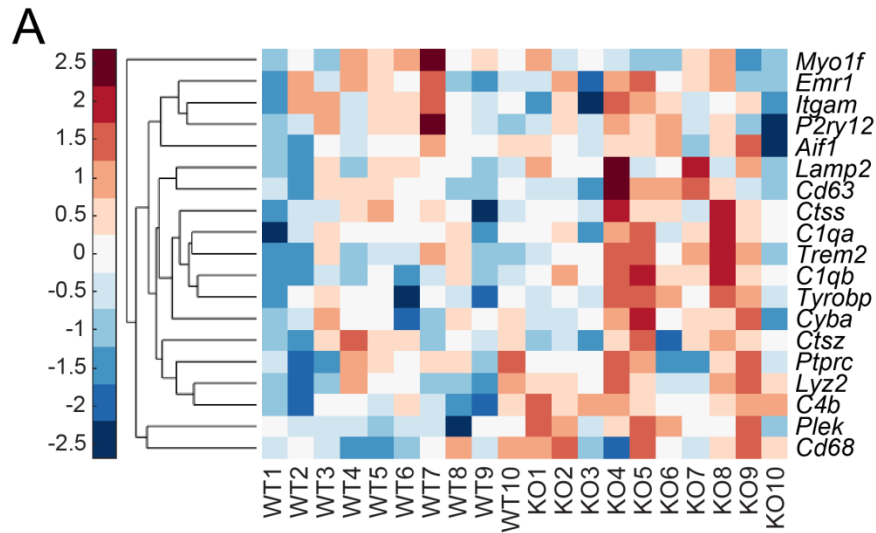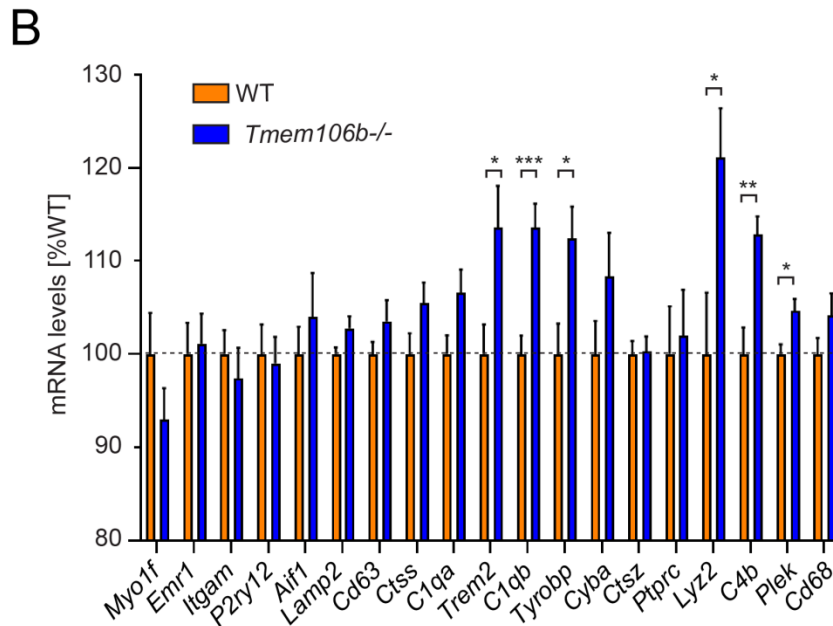

**Supplementary Figure 10. Increased expression of *TYROBP* network genes (TNGs) in *Tmem106b*<sup>-/-</sup> mice.** (A) Hierarchical clustering of 19 TNGs. (B) Expression values of the TNGs in WT and *Tmem106b*<sup>-/-</sup> mice. Graphs represent the mean ± S.E.M. Asterisks indicate significant differences between WT and *Tmem106b*<sup>-/-</sup> mice (\*unadjusted p < 0.05, \*\* unadjusted p < 0.01, \*\*\* unadjusted p < 0.001) (n = 10 per group).

### Supplementary Figure 11

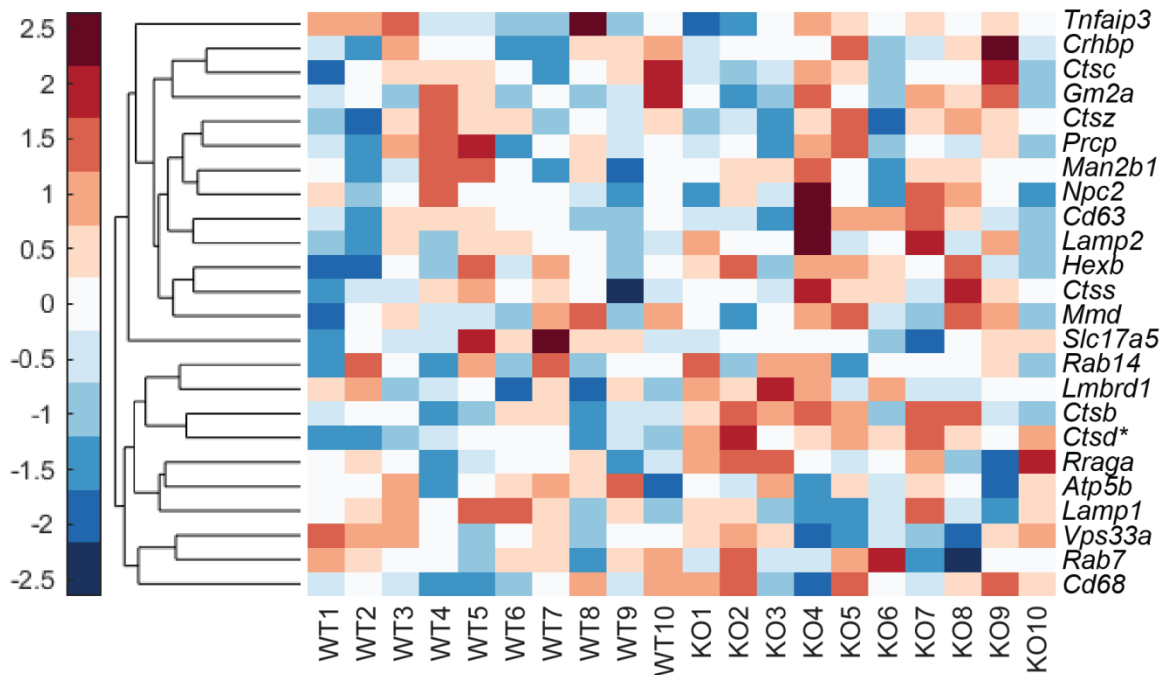

**Supplementary Figure 11. Expression of progranulin-deficiency associated lysosomal genes in *Tmem106b*<sup>-/-</sup> mice.** Hierarchical clustering of 24 progranulin-deficiency associated lysosomal genes in *Tmem106b*<sup>+/+</sup> (WT) and *Tmem106b*<sup>-/-</sup> (KO) mice. \*p<0.05, n=10.



Supplementary Figure 13 unmodified full-length blots in Figure 4 A, C, E, G

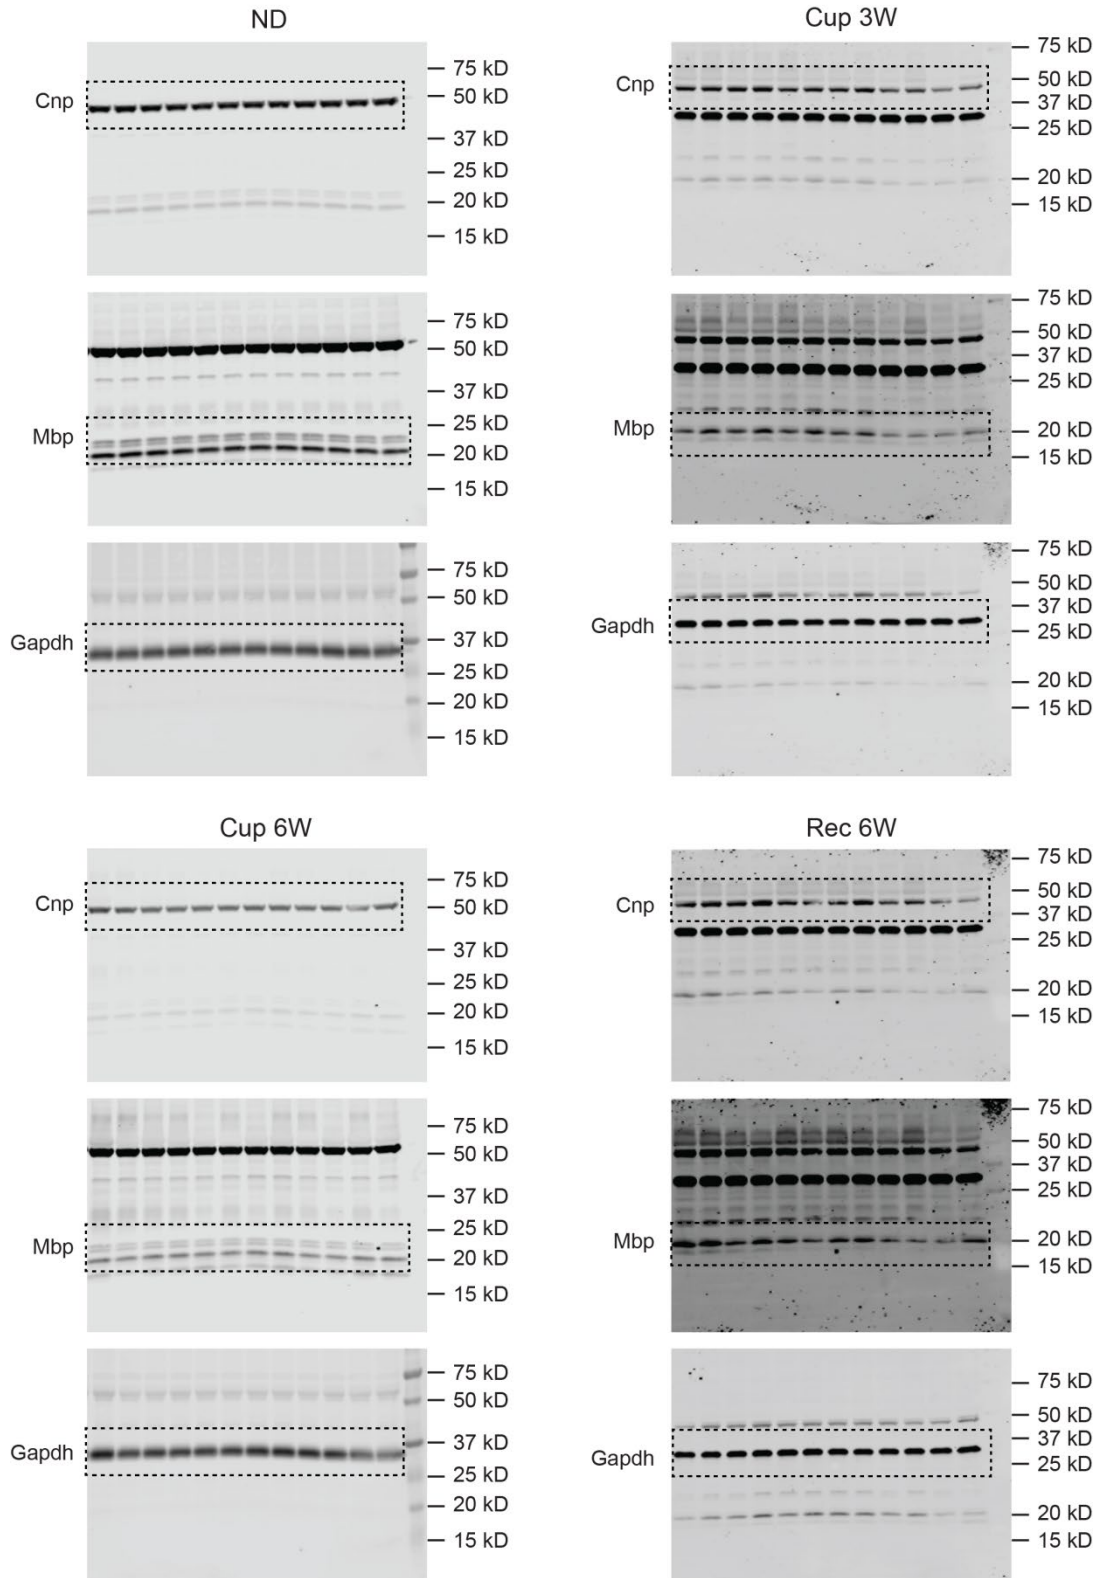

Supplementary Figure 14 unmodified full-length blots in Supplementary Figure 7 B-E

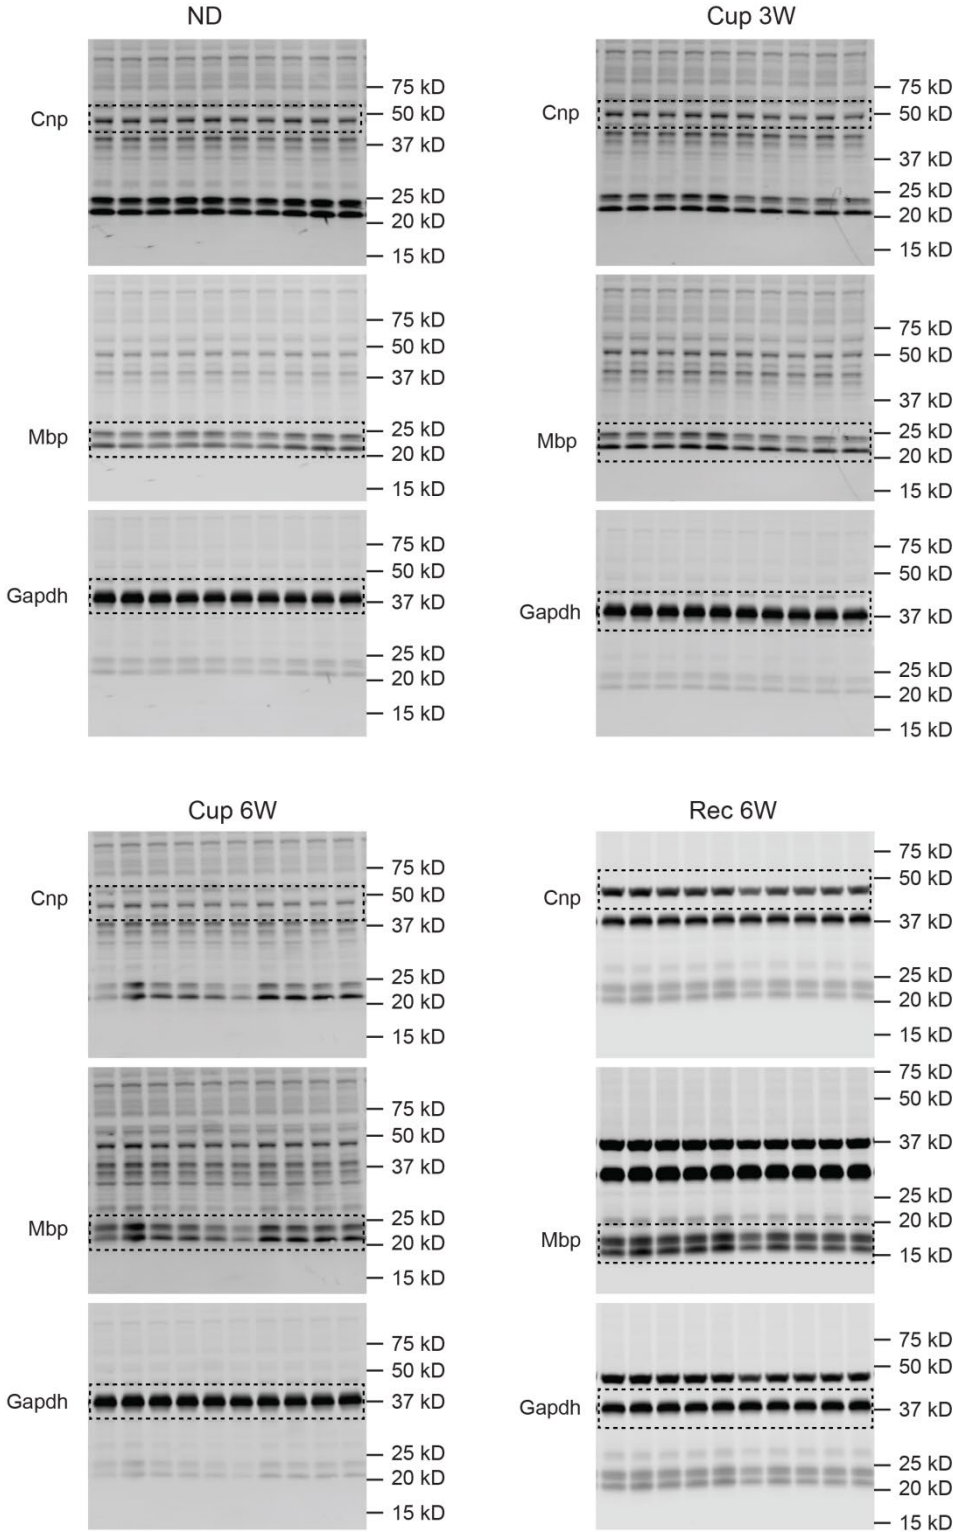

Supplement: awaa141_supplementary_data.pdf [file awaa141_supplementary_data.pdf]
